# Supplementary material for: Selective Halogen-Lithium Exchange of 1,2-Dihaloarenes for Successive [2+4] Cycloadditions of Arynes and Isobenzofurans
Source: Molecules. 2015 Oct 23;20(10):19449–62. doi: 10.3390/molecules201019449 (PMC6331892; doi:10.3390/molecules201019449)
Supplement: Supplementary file 1 [file molecules-20-19449-s001.pdf]

# Supplementary Materials

## 1. General Experimental Procedures

All experiments dealing with air- and moisture-sensitive compounds were conducted under an atmosphere of dry argon. THF (anhydrous; Wako Pure Chemical Industries, Ltd., Osaka, Japan) was used as received.

For thin-layer chromatography (TLC) analysis, Merck pre-coated plates (silica gel 60 F<sub>254</sub>, Art 5715, 0.25 mm, Merck Japan, Tokyo, Japan) were used. For flash column chromatography, silica gel 60 N (spherical, neutral, 63–210  $\mu$ m) from Kanto Chemical (Tokyo, Japan) was used.

<sup>1</sup>H-NMR and <sup>13</sup>C-NMR were measured on a JEOL JNM ECA-300 and a JEOL JNM ECX-500II spectrometer (JEOL, Tokyo, Japan). Attenuated Total Reflectance Fourier Transformation Infrared (ATR-FTIR) spectra were recorded on a FT/IR-4200 FT-IR Spectrometer (JASCO, Tokyo, Japan). High resolution mass spectra were obtained with a JEOL JMS 700 spectrometer and a JEOL AccuTOF LC-plus JMS-T100LP. Melting point (mp) determinations were performed by using a MPA100 OptiMelt Automated Melting Point System (OptiMelt, Sunnyvale, California, CA, USA) and are uncorrected.

## 2. Preparation of 5-Bromo-6-chloro-1,3-diphenylisobenzofuran (9b)

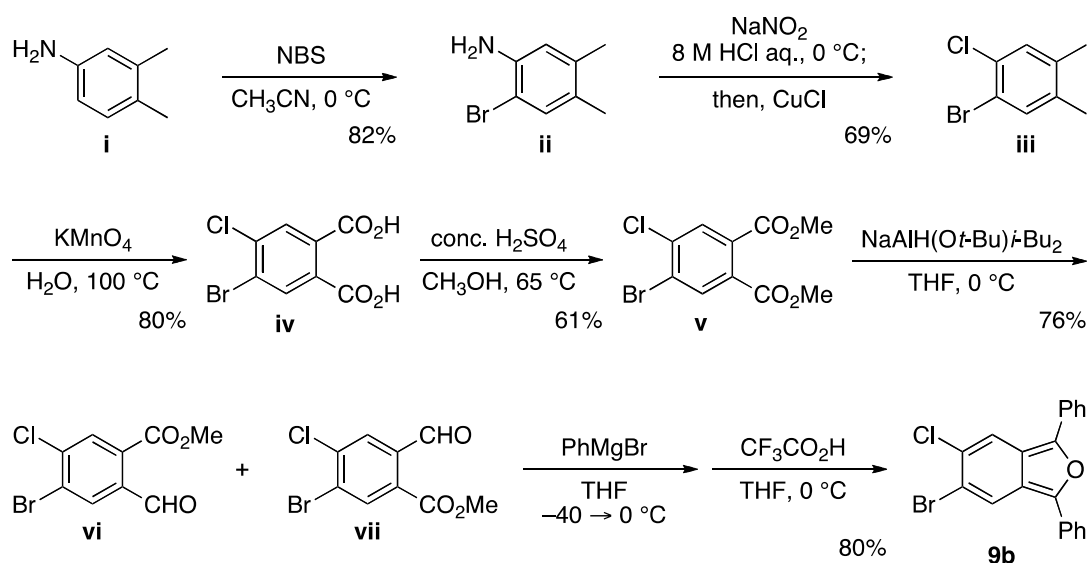

**2-Bromo-4,5-dimethylaniline (ii).** To a solution of 3,4-dimethylaniline (**i**) (30.3 g, 250 mmol) in CH<sub>3</sub>CN (250 mL) was added *N*-bromosuccinimide (48.9 g, 275 mmol) in CH<sub>3</sub>CN (350 mL) through a dropping funnel at 0 °C. After stirring for 0.5 h, the reaction was stopped by adding sat. aq. NaHCO<sub>3</sub>. The products were extracted with EtOAc (X3), washed with brine, dried (Na<sub>2</sub>SO<sub>4</sub>), and concentrated *in vacuo*. The residue was purified by silica-gel flash column chromatography (hexane/EtOAc = 95/5) to give 2-bromo-4,5-dimethylaniline (**ii**) (41.0 g, 82.0%) as white solids. Recrystallization from hexane gave **ii** as colorless prisms.

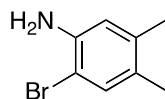

*2-Bromo-4,5-dimethylaniline* (**ii**). Mp 84.3–85.3 °C (hexane);  $^1\text{H-NMR}$  ( $\text{CDCl}_3$ ,  $\delta$ ) 2.12 (m, 6H), 3.85 (br s, 2H), 6.56 (s, 1H), 7.15 (s, 1H);  $^{13}\text{C-NMR}$  ( $\text{CDCl}_3$ ,  $\delta$ ) 18.5, 19.4, 106.1, 117.2, 128.0, 132.9, 136.8, 141.7; IR (ATR) 3453, 3369, 3020, 2979, 2915, 2878, 1609, 1496, 1450, 1383, 1281, 1150, 970, 874, 853, 731  $\text{cm}^{-1}$ ; HRMS (ESI)  $m/z$  200.0082 (200.0075 calcd for  $\text{C}_8\text{H}_{11}\text{BrN}$ ,  $[\text{M} + \text{H}]^+$ ).

*1-Bromo-2-chloro-4,5-dimethylbenzene* (**iii**). To a suspension of aniline **ii** (20.0 g, 100 mmol) in  $\text{H}_2\text{O}$  (50 mL) was added 12 M HCl (100 mL) and the reaction mixture was cooled to 0 °C, to which was gradually added  $\text{NaNO}_2$  (8.99 g, 130 mmol) in  $\text{H}_2\text{O}$  (30 mL) followed by CuCl (12.1 g, 122 mmol) dissolved in 12 M HCl (30 mL) at same temperature. After warmed up to room temperature, the reaction was stirred for further 20 min. The products were extracted with  $\text{Et}_2\text{O}$  (X3), and the combined organic extracts were washed with 25%  $\text{NH}_3$  aq. and brine, dried ( $\text{Na}_2\text{SO}_4$ ), and concentrated *in vacuo*. Purification of the crude products by recrystallization from MeOH gave 1-bromo-2-chloro-4,5-dimethylbenzene (**iii**) (15.2 g, 69.2%) as colorless prisms.

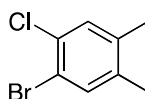

*1-Bromo-2-chloro-4,5-dimethylbenzene* (**iii**). Mp 74.1–74.6 °C;  $^1\text{H-NMR}$  ( $\text{CDCl}_3$ ,  $\delta$ ) 2.19 (s, 3H), 2.20 (s, 3H), 7.21 (s, 1H), 7.36 (s, 1H);  $^{13}\text{C-NMR}$  ( $\text{CDCl}_3$ ,  $\delta$ ) 19.0, 19.2, 118.7, 131.0, 134.2, 136.9, 137.4; IR (ATR) 3044, 2978, 2921, 2857, 1590, 1469, 1444, 1382, 1349, 1161, 1123, 1020, 993, 912, 875  $\text{cm}^{-1}$ ; HRMS (DART)  $m/z$  217.9508 (217.9498 calcd for  $\text{C}_8\text{H}_8\text{BrCl}$ ,  $\text{M}^+$ ).

*4-Bromo-5-chlorophthalic acid* (**iv**). A mixture of *o*-xylene **iii** (8.50 g, 38.7 mmol) and  $\text{KMnO}_4$  (30.8 g, 195 mmol) in  $\text{H}_2\text{O}$  (300 mL) was refluxed for 20 h. After cooled to room temperature, the reaction was stopped by adding  $\text{NaHSO}_3$  followed by aq. KOH. The mixture was filtered through a Büchner funnel and the filtrate was acidified by adding 12 M HCl. The filtration was washed by hexane (X3) to give essentially pure 4-bromo-5-chlorophthalic acid (**iv**) (8.60 g, 79.6%) as white solids. Recrystallization from hexane/acetone gave **iv** as white solids.

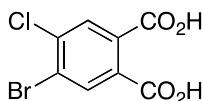

*4-Bromo-5-chlorophthalic acid* (**iv**). Mp decomposed at 300 °C;  $^1\text{H-NMR}$  (acetone- $d_6$ ,  $\delta$ ) 7.91 (s, 1H), 8.08 (s, 1H);  $^{13}\text{C-NMR}$  (acetone- $d_6$ ,  $\delta$ ) 125.2, 131.2, 133.5, 134.4, 134.9, 137.4, 166.7, 166.9; IR (ATR) 3099, 2812 (br), 1685, 1613, 1526, 1442, 1354, 1271, 1249, 1150, 1091, 919, 896, 759  $\text{cm}^{-1}$ ; HRMS (DART)  $m/z$  278.9063 (278.9060 calcd for  $\text{C}_8\text{H}_5\text{BrClO}_4$ ,  $[\text{M} + \text{H}]^+$ ).

*Dimethyl 4-bromo-5-chlorophthalate* (**v**). To a solution of phthalic acid **iv** (5.60 g, 20.0 mmol) in MeOH (65 mL) was added conc.  $\text{H}_2\text{SO}_4$  (1.6 mL, 30.0 mmol) at room temperature, and the reaction was refluxed for 5 h. After evaporating the organic solvent, sat. aq.  $\text{NaHCO}_3$  was added to the reaction mixture. The products were extracted with  $\text{EtOAc}$  (X3), and the combined organic extracts were washed with brine, dried ( $\text{Na}_2\text{SO}_4$ ), and concentrated *in vacuo*. The residue was purified by silica-gel flash column chromatography

(EtOAc) to give dimethyl 4-bromo-5-chlorophthalate (**v**) (3.76 g, 61.0%). Recrystallization from hexane gave **v** as colorless prisms.

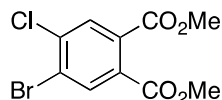

*Dimethyl 4-bromo-5-chlorophthalate (v)*. Mp 45.4–45.9 °C;  $^1\text{H-NMR}$  ( $\text{CDCl}_3$ ,  $\delta$ ) 3.91 (m, 6H), 7.80 (s, 1H), 7.99 (s, 1H);  $^{13}\text{C-NMR}$  ( $\text{CDCl}_3$ ,  $\delta$ ) 53.1, 125.7, 130.6, 131.2, 132.1, 134.2, 137.9, 165.9, 166.1; IR (ATR) 3014, 2961, 2850, 1731, 1588, 1544, 1434, 1356, 1275, 1222, 1121, 1083, 972, 909, 876, 820, 784, 753  $\text{cm}^{-1}$ ; HRMS (ESI)  $m/z$  306.9376 (306.9373 calcd for  $\text{C}_{10}\text{H}_9\text{BrClO}_4$ ,  $[\text{M} + \text{H}]^+$ ).

*Methyl 4-bromo-5-chloro-2-formylbenzoate (vi)*. To a solution of dimethyl phthalate **v** (3.89 g, 12.6 mmol) in THF (25 mL) was added SDBBA [1] (0.5 M in THF, 39.0 mL, 19.5 mmol) at 0 °C. After 2.5 h, the reaction was stopped by adding 2 M HCl. The products were extracted with EtOAc (X3), and the combined organic extracts were washed with sat. aq.  $\text{NaHCO}_3$  and brine, dried ( $\text{Na}_2\text{SO}_4$ ), and concentrated *in vacuo*. The residue was purified by silica-gel flash column chromatography (hexane/EtOAc = 9/1) to give methyl 4-bromo-5-chloro-2-formylbenzoate (**vi**) (2.65 g, 75.8%, **vi/vii** = 50/50) as a mixture of regioisomers.

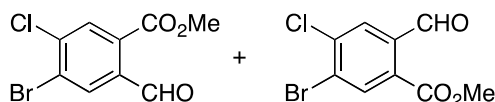

*Methyl 4-bromo-5-chloro-2-formylbenzoate (vi) and Methyl 5-bromo-4-chloro-2-formylbenzoate (vii)*.  $^1\text{H-NMR}$  ( $\text{CDCl}_3$ ,  $\delta$ ) 3.99 (s, 6H), 8.00 (s, 1H), 8.08 (s, 1H), 8.20 (s, 1H), 8.28 (s, 1H), 10.59 (s, 1H), 10.60 (s, 1H);  $^{13}\text{C-NMR}$  ( $\text{CDCl}_3$ ,  $\delta$ ) 53.2, 128.0, 130.0, 130.6, 131.4, 132.3, 133.8, 136.0, 136.8, 139.8, 139.9, 164.7, 164.9, 189.7, 190.0; IR (ATR) 3093, 3023, 2960, 2911, 1712, 1693, 1577, 1547, 1433, 1290, 1273, 1195, 1171, 1095, 960, 916, 903, 837, 780  $\text{cm}^{-1}$ ; HRMS (DART)  $m/z$  276.9267 (276.9267 calcd for  $\text{C}_9\text{H}_7\text{BrClO}_3$ ,  $[\text{M} + \text{H}]^+$ ).

*5-Bromo-6-chloro-1,3-diphenylisobenzofuran (9b)*. To a solution of methyl 2-formylbenzoate **vi** and **vii** (2.46 g, 8.86 mmol) in THF (15 mL) was added phenylmagnesium bromide (1.0 M in THF, 26.0 mL, 26 mmol) at –40 °C. After warmed up to 0 °C,  $\text{CF}_3\text{CO}_2\text{H}$  (5.06 g, 44.4 mmol) was added to the mixture at same temperature, and the reaction stirred for further 10 min. The reaction was stopped by adding sat. aq.  $\text{NaHCO}_3$ , and the products were extracted with  $\text{CH}_2\text{Cl}_2$  (X3), washed with brine, dried ( $\text{Na}_2\text{SO}_4$ ), and concentrated *in vacuo*. Trituration of the crude products with  $\text{Et}_2\text{O}$  at –78 °C gave 5-bromo-6-chloro-1,3-diphenylisobenzofuran (**9b**) (2.73 g, 80.4%). Recrystallization from hexane/ $\text{CHCl}_3$  gave **9b** as yellow needles.

---

[1] Sodium diisobutyl-*tert*-butoxyaluminium (SDBBA) was prepared as follows: to a solution of sodium *tert*-butoxide (2.44 g, 25.4 mmol) in THF (25 mL) was added diisobutylaluminium hydride (1.0 M in hexane, 25.0 mL, 25.0 mmol) at 0 °C, and the mixture was stirred for 1 h to give SDBBA (0.5 M in THF).

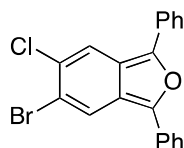

**5-Bromo-6-chloro-1,3-diphenylisobenzofuran (9b).** Mp 169.3–170.0 °C (hexane/CHCl<sub>3</sub>); <sup>1</sup>H-NMR (CDCl<sub>3</sub>, δ) 7.30–7.38 (m, 2H), 7.47–7.53 (m, 4H), 7.84–7.89 (m, 4H), 7.96 (s, 1H), 8.18 (s, 1H); <sup>13</sup>C-NMR (CDCl<sub>3</sub>, δ) 119.7, 120.5, 120.7, 121.0, 124.8, 124.88, 124.92, 127.69, 127.74, 129.1, 130.6, 130.8; IR (ATR) 3059, 1599, 1524, 1484, 1443, 1339, 1173, 1065, 967, 900, 856, 797, 753 cm<sup>-1</sup>; HRMS (DART) *m/z* 382.9831 (382.9838 calcd for C<sub>20</sub>H<sub>13</sub>BrClO, [M + H]<sup>+</sup>).

### 3. <sup>1</sup>H- and <sup>13</sup>C-NMR Spectra of the Products

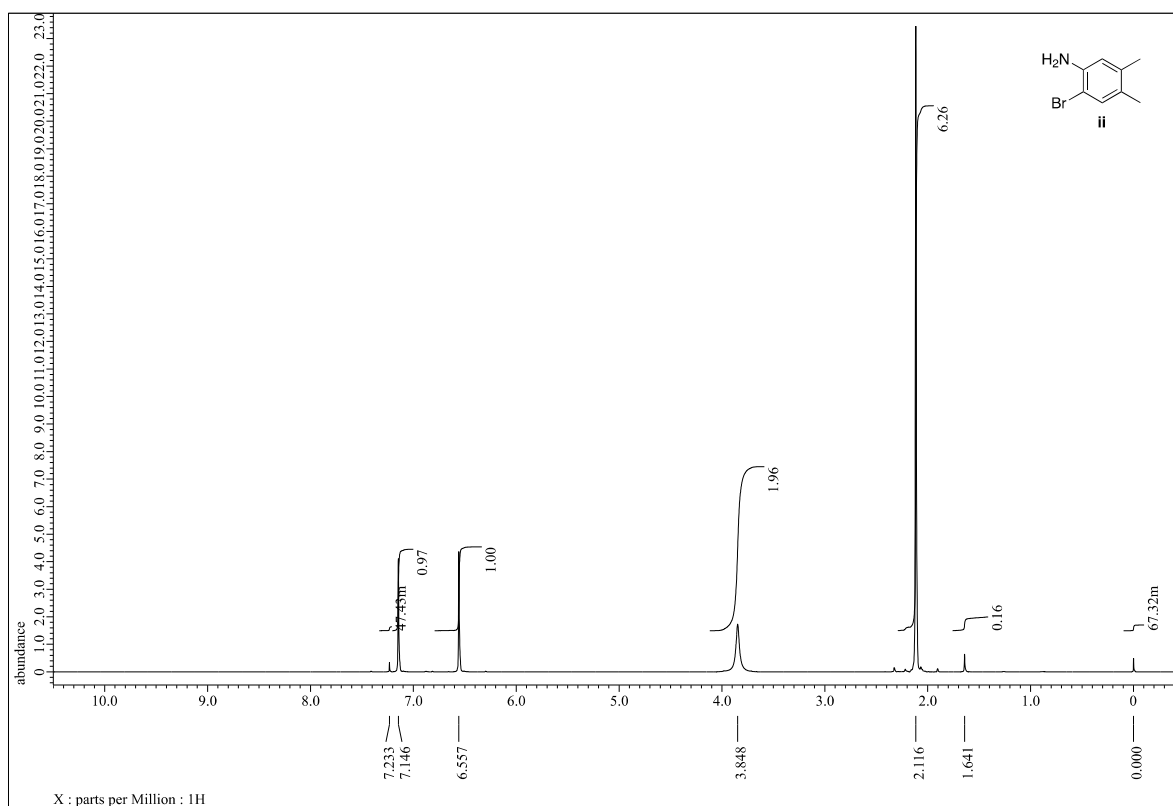

**Figure S1.** <sup>1</sup>H-NMR (300 MHz, CDCl<sub>3</sub>) spectrum of aniline **ii**.

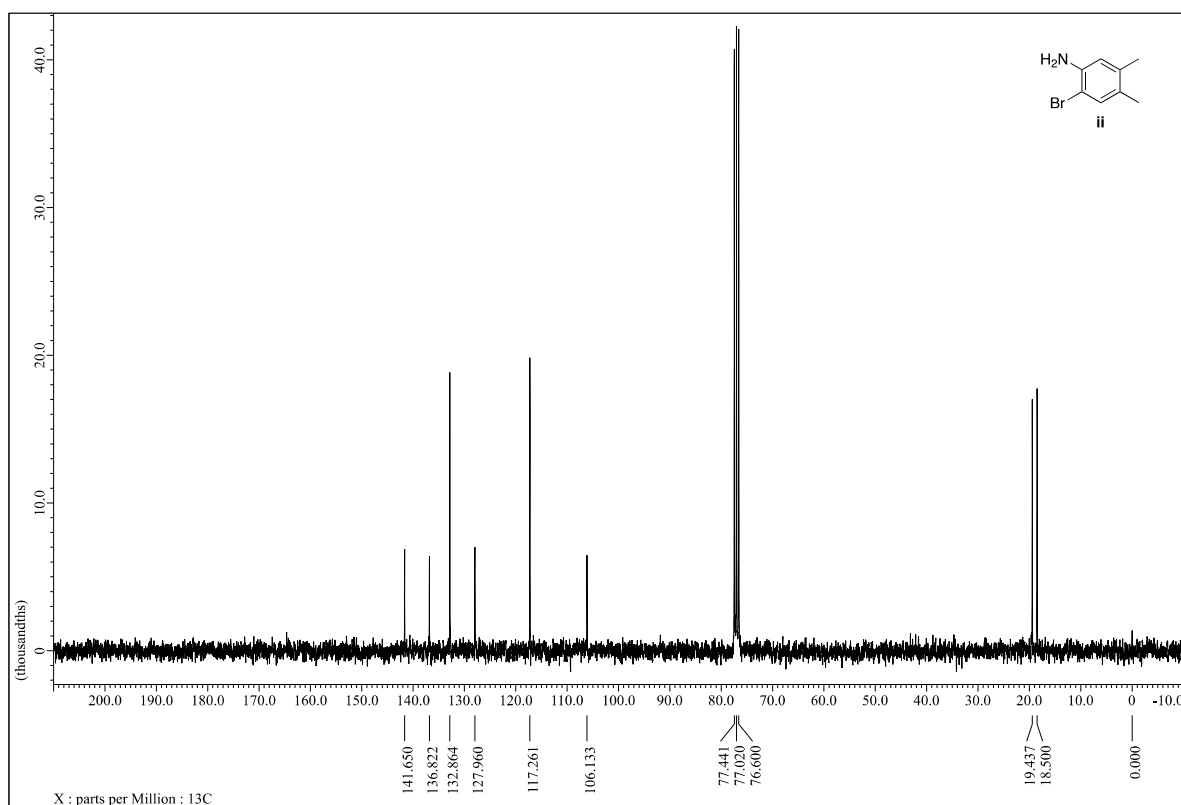

**Figure S2.** <sup>13</sup>C-NMR (300 MHz, CDCl<sub>3</sub>) spectrum of aniline **ii**.

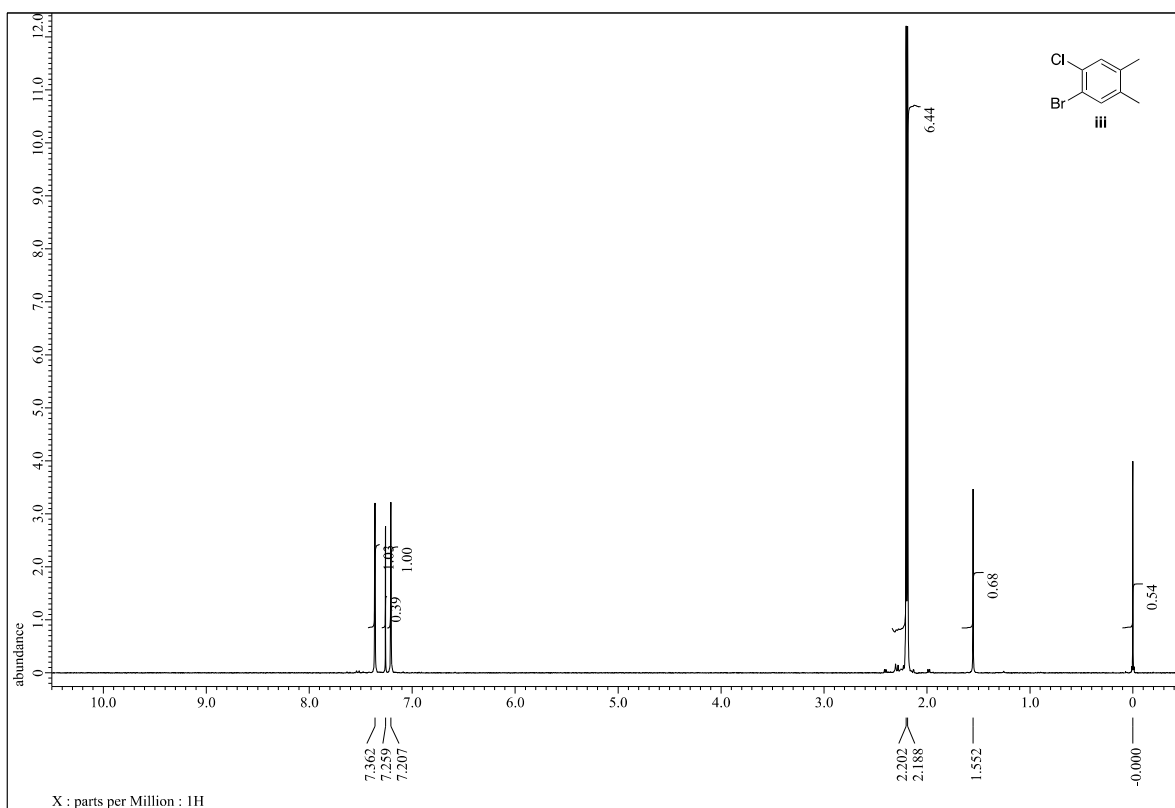

**Figure S3.** <sup>1</sup>H-NMR (300 MHz, CDCl<sub>3</sub>) spectrum of *o*-xylene **iii**.

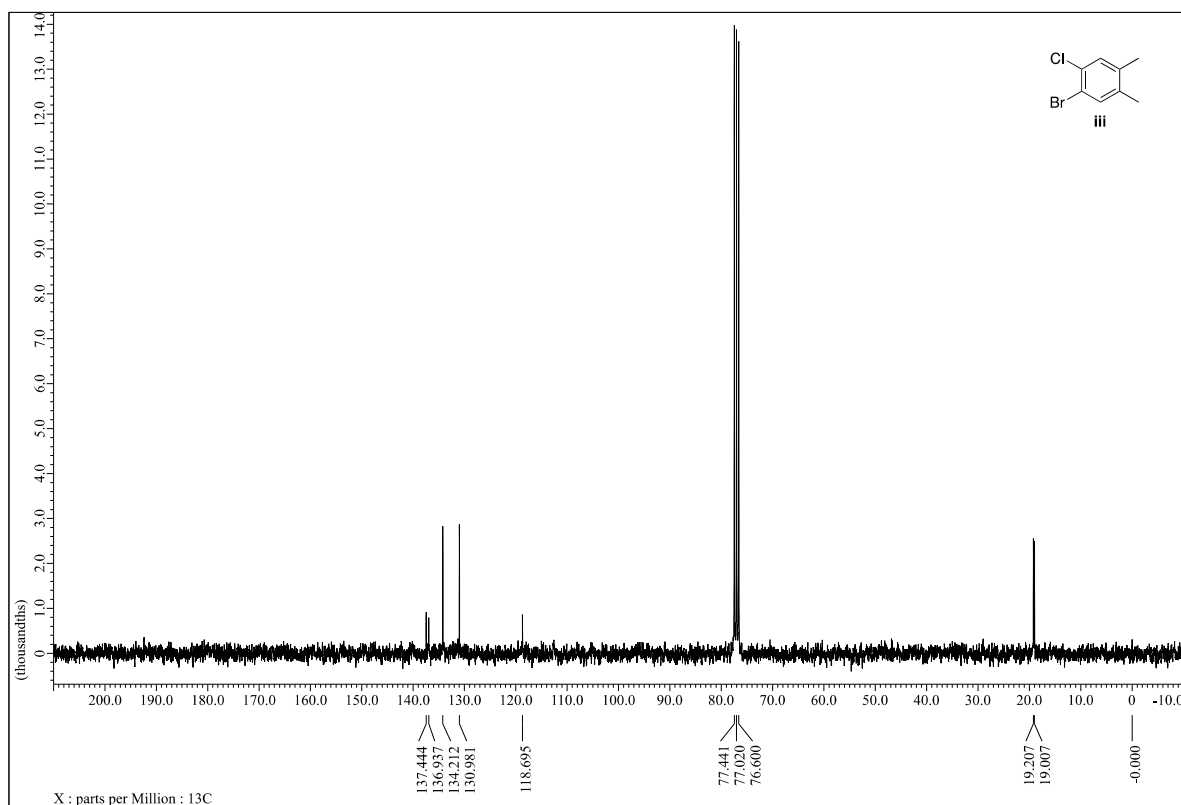

**Figure S4.**  $^{13}\text{C}$ -NMR (300 MHz,  $\text{CDCl}_3$ ) spectrum of *o*-xylene **iii**.

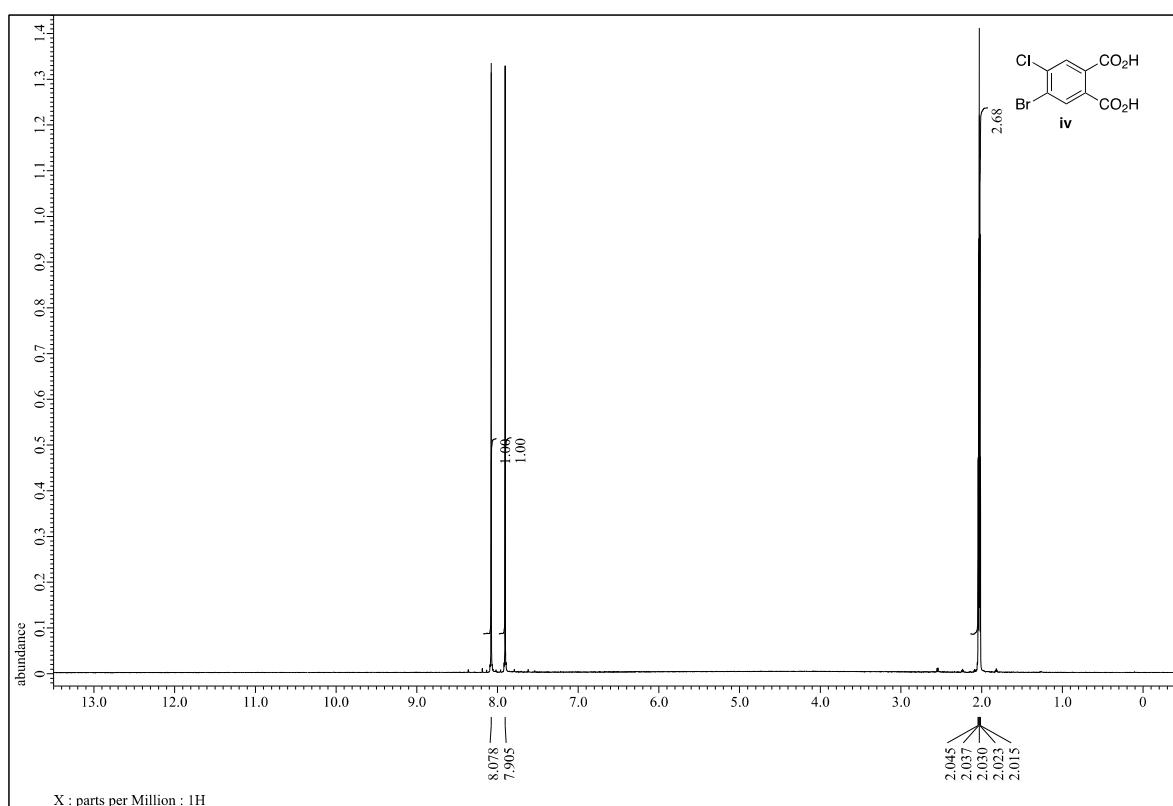

**Figure S5.**  $^1\text{H}$ -NMR (300 MHz,  $\text{acetone-}d_6$ ) spectrum of phthalic acid **iv**.

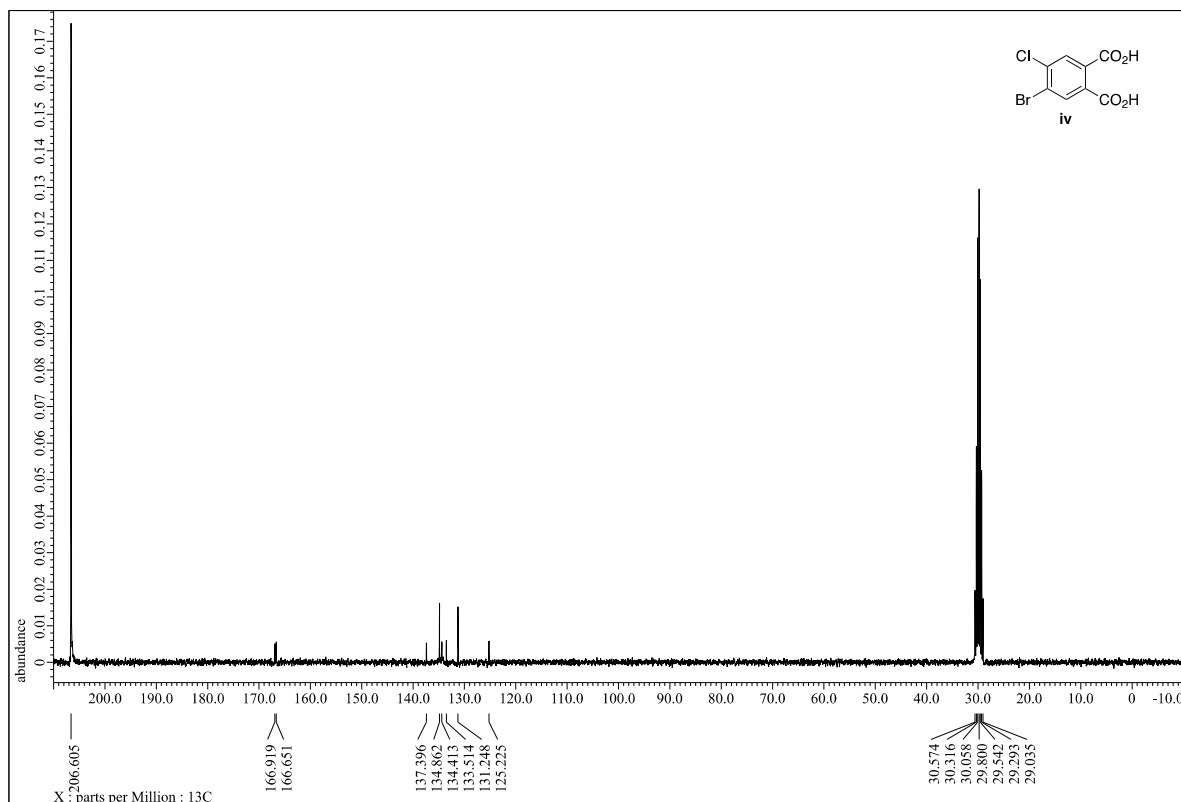

**Figure S6.** <sup>13</sup>C-NMR (300 MHz, acetone-*d*<sub>6</sub>) spectrum of phthalic acid **iv**.

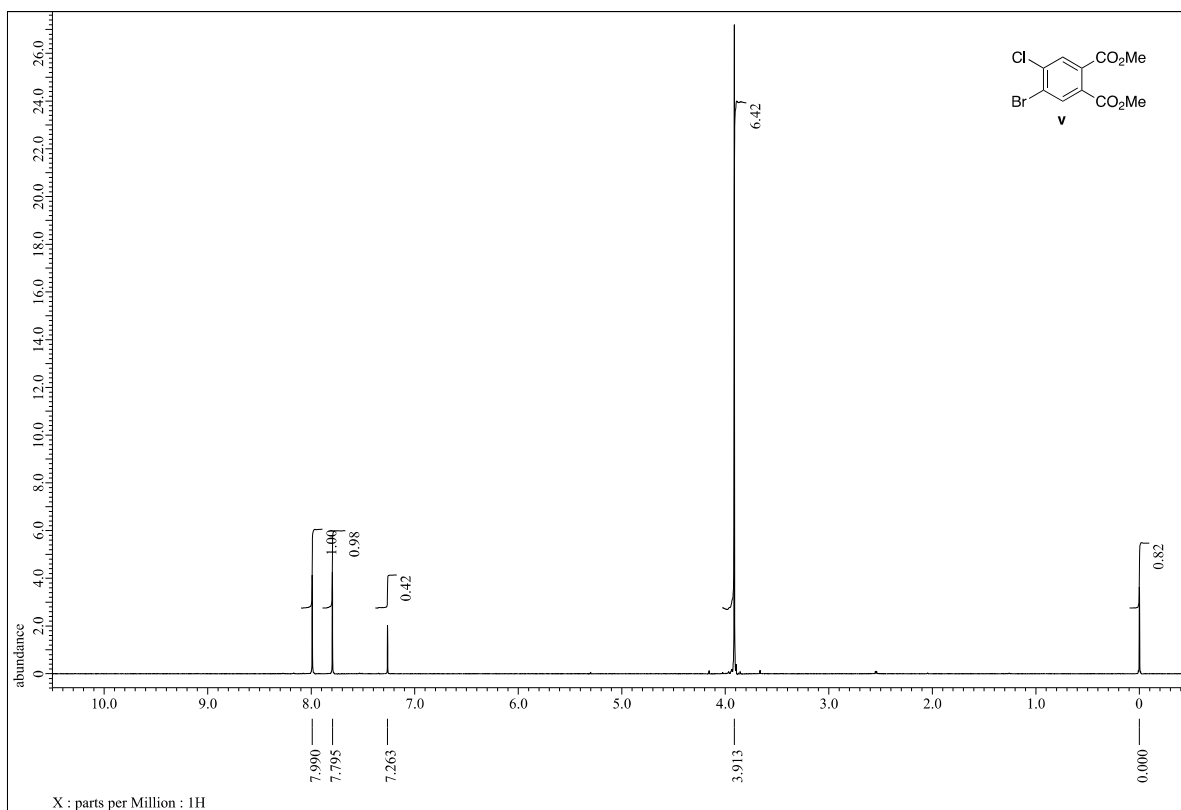

**Figure S7.** <sup>1</sup>H-NMR (300 MHz, CDCl<sub>3</sub>) spectrum of dimethyl phthalate **v**.

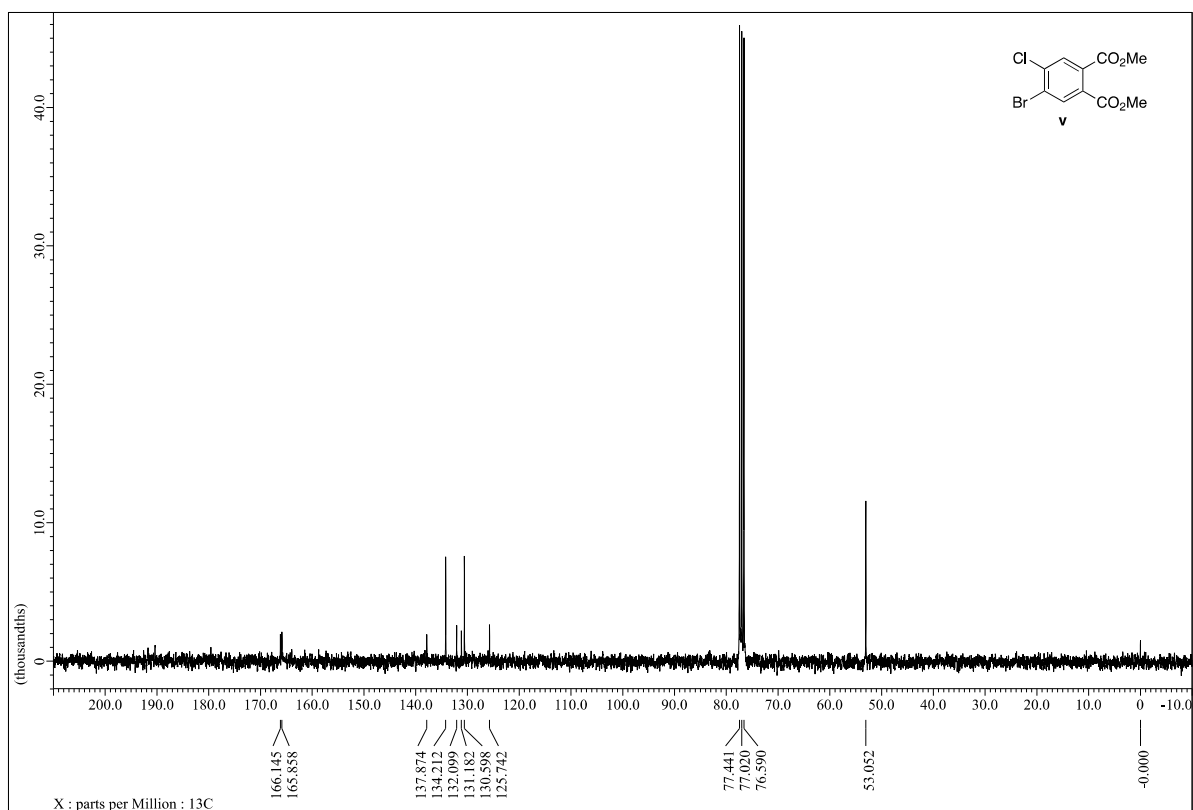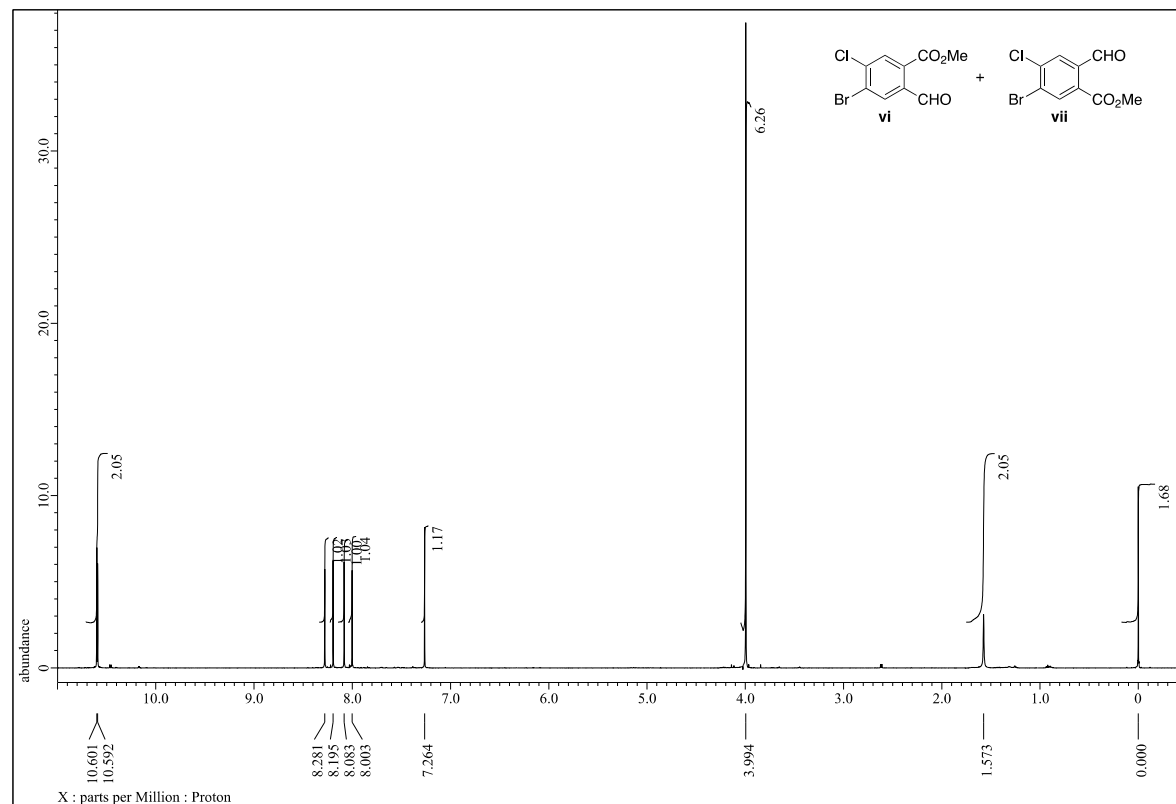

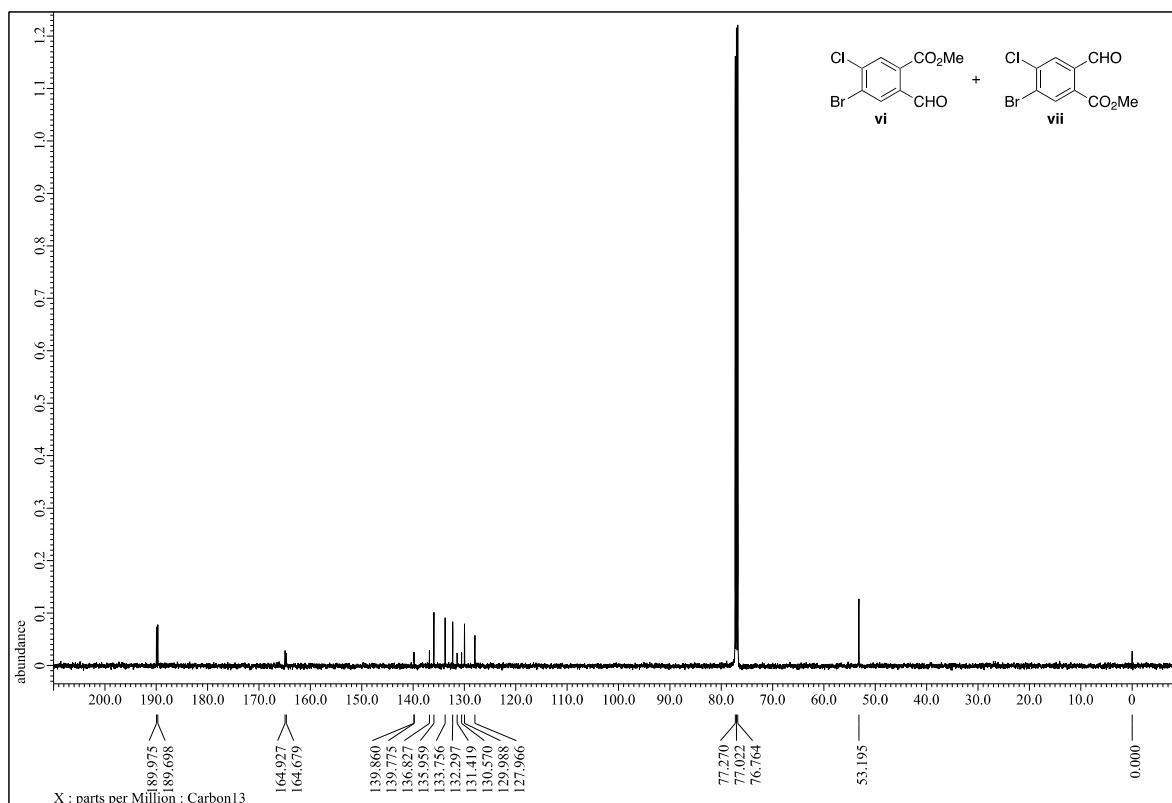

**Figure S10.**  $^{13}\text{C}$ -NMR (500 MHz,  $\text{CDCl}_3$ ) spectrum of methyl 2-formylbenzoate **vi** and **vii**.

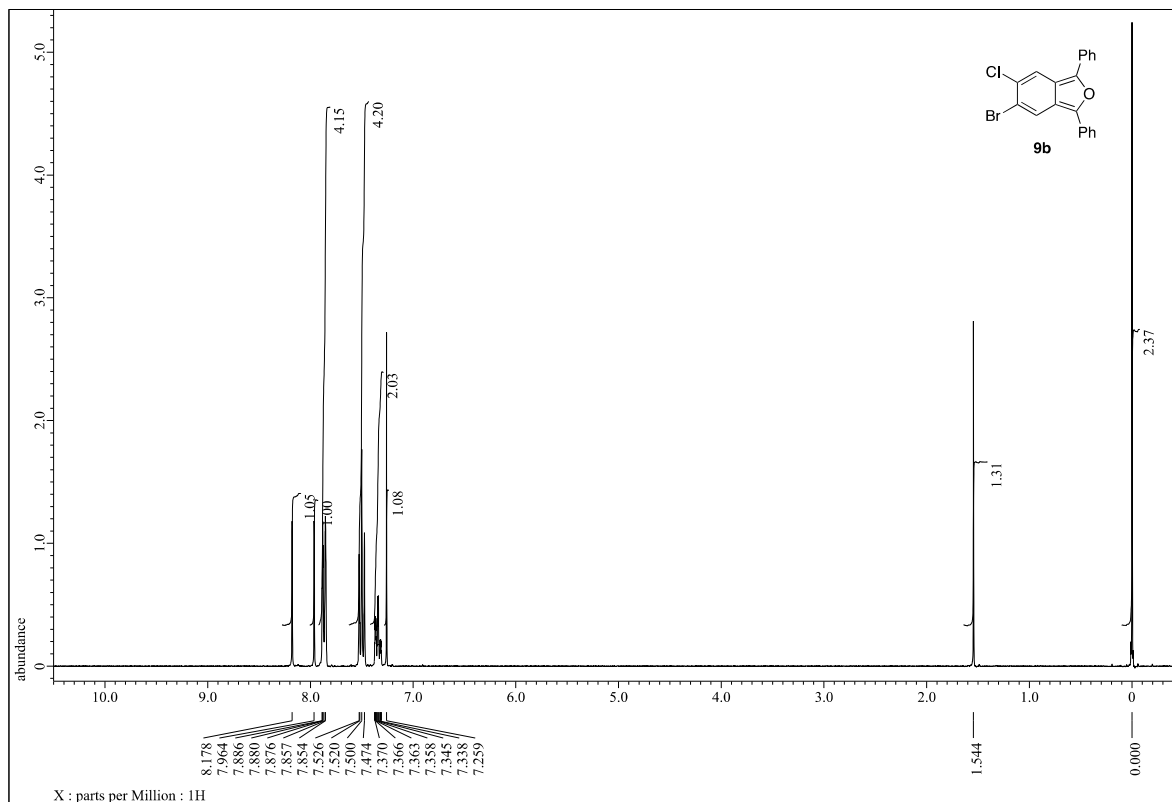

**Figure S11.**  $^1\text{H}$ -NMR (300 MHz,  $\text{CDCl}_3$ ) spectrum of isobenzofuran **9b**.

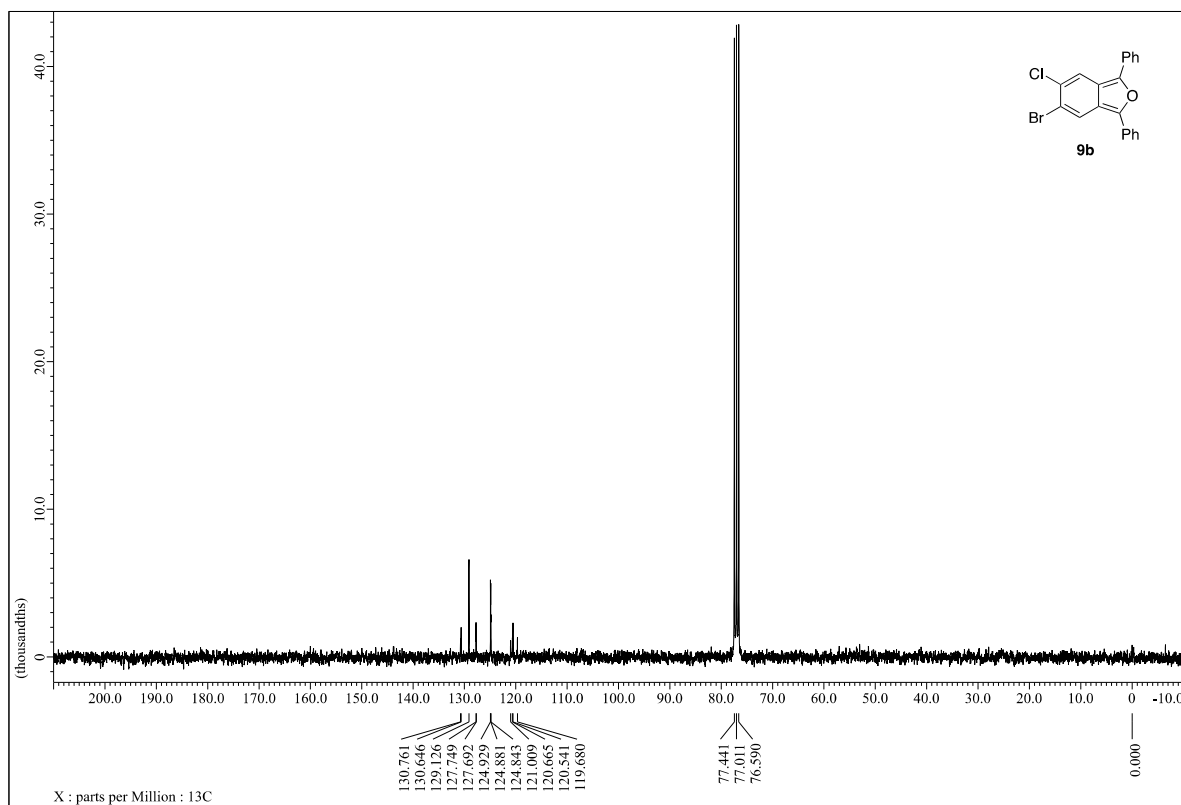

**Figure S12.**  $^{13}\text{C}$ -NMR (300 MHz,  $\text{CDCl}_3$ ) spectrum of isobenzofuran **9b**.

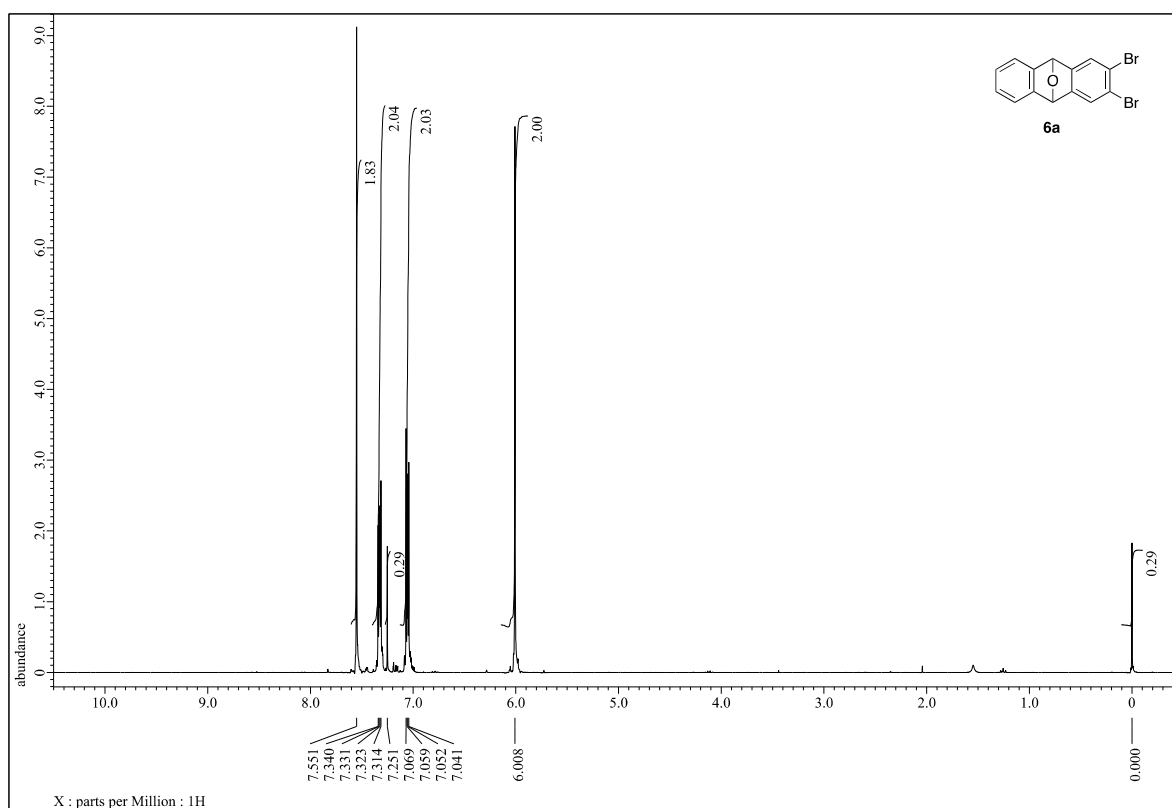

**Figure S13.**  $^1\text{H}$ -NMR (300 MHz,  $\text{CDCl}_3$ ) spectrum of cycloadduct **6a**.

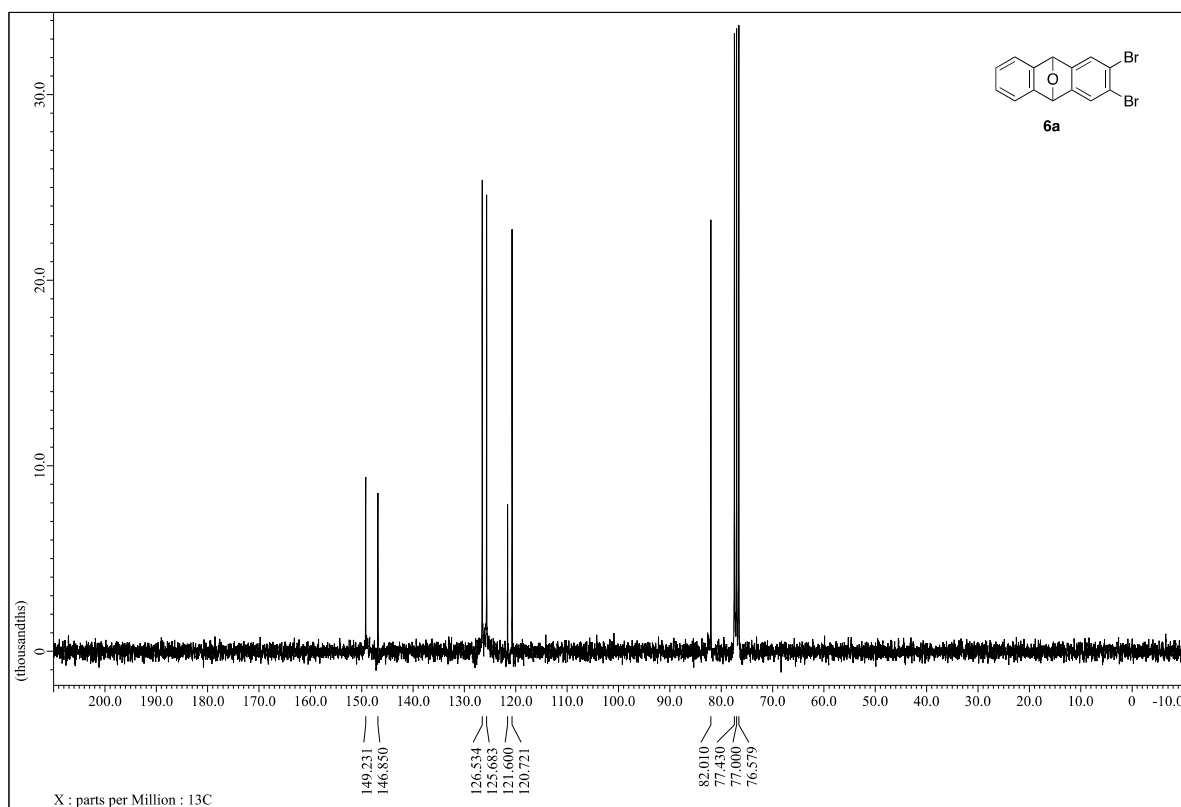

**Figure S14.** <sup>13</sup>C-NMR (300 MHz, CDCl<sub>3</sub>) spectrum of cycloadduct **6a**.

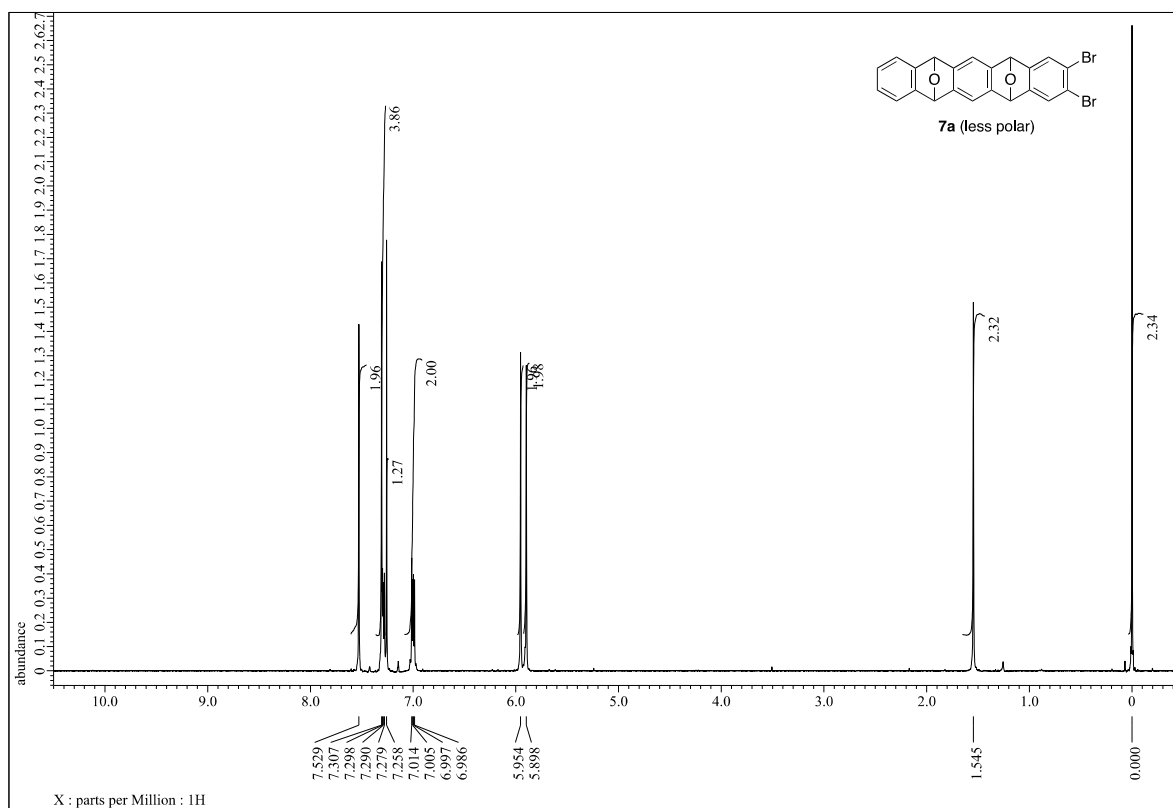

**Figure S15.** <sup>1</sup>H-NMR (300 MHz, CDCl<sub>3</sub>) spectrum of cycloadduct **7a** (less polar).

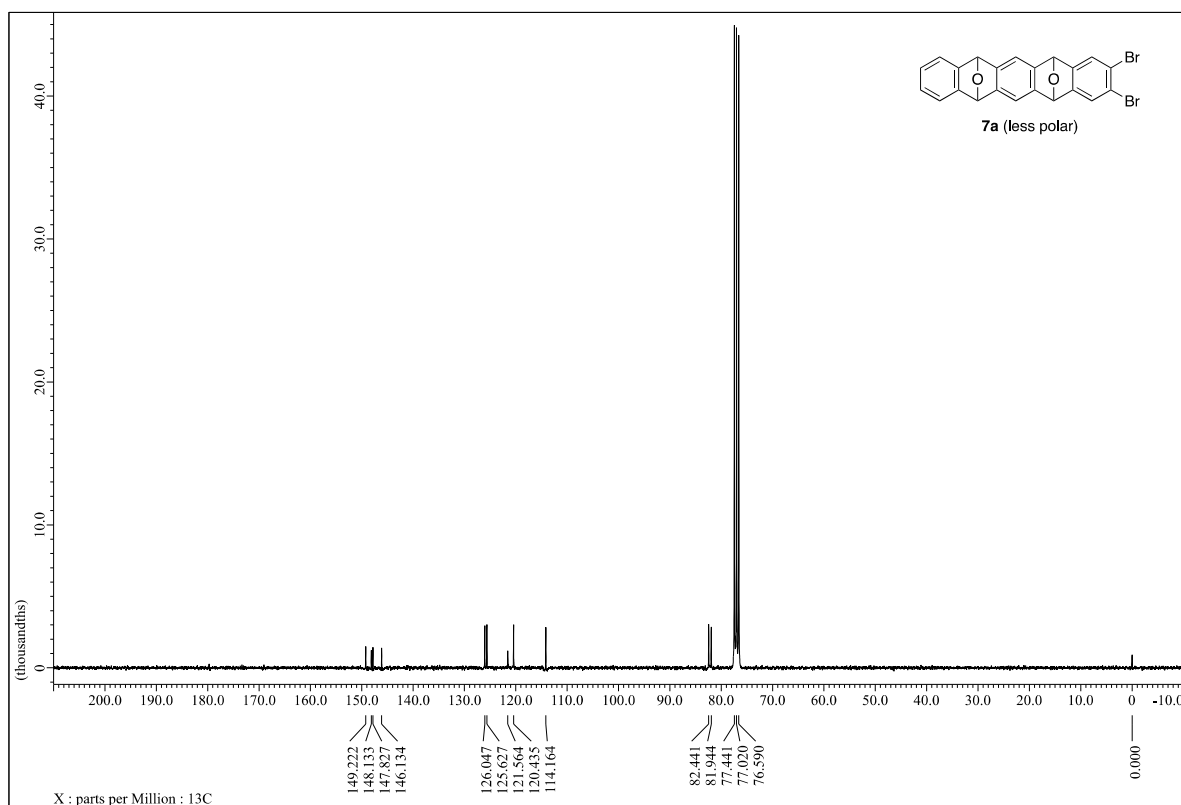

**Figure S16.**  $^{13}\text{C}$ -NMR (300 MHz,  $\text{CDCl}_3$ ) spectrum of cycloadduct **7a** (less polar).

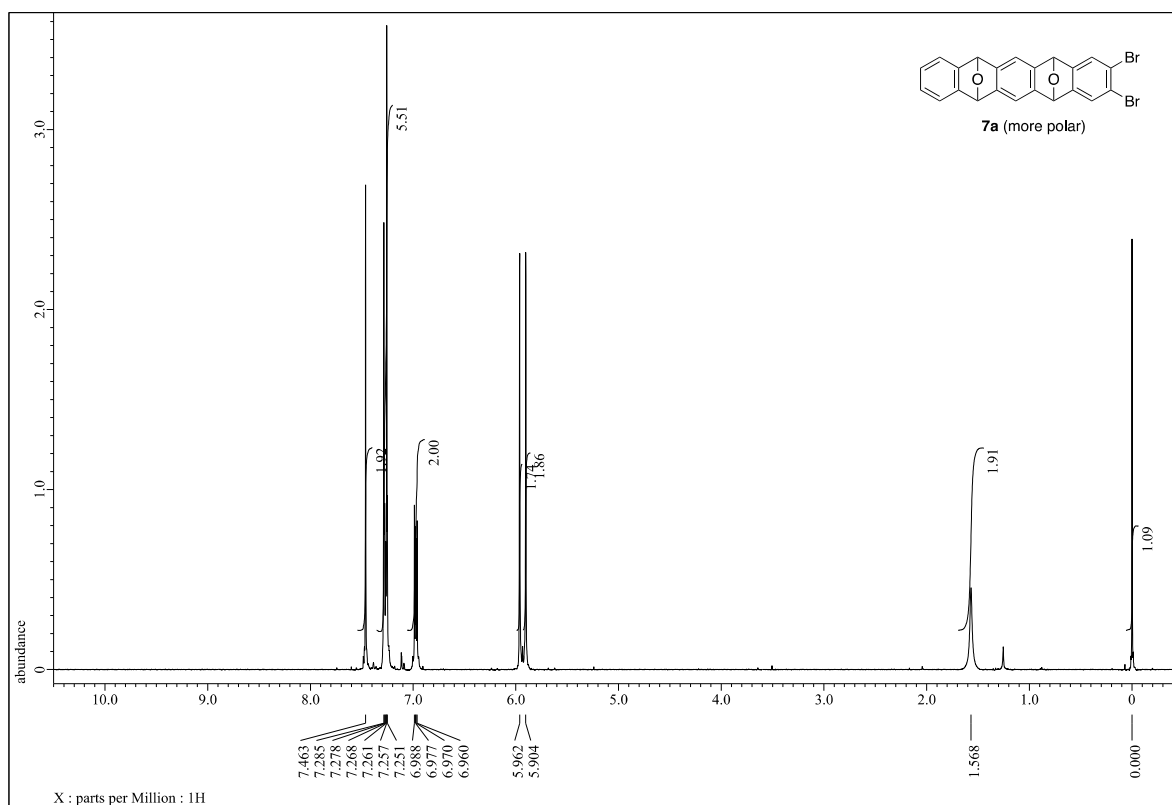

**Figure S17.**  $^1\text{H}$ -NMR (300 MHz,  $\text{CDCl}_3$ ) spectrum of cycloadduct **7a** (more polar).

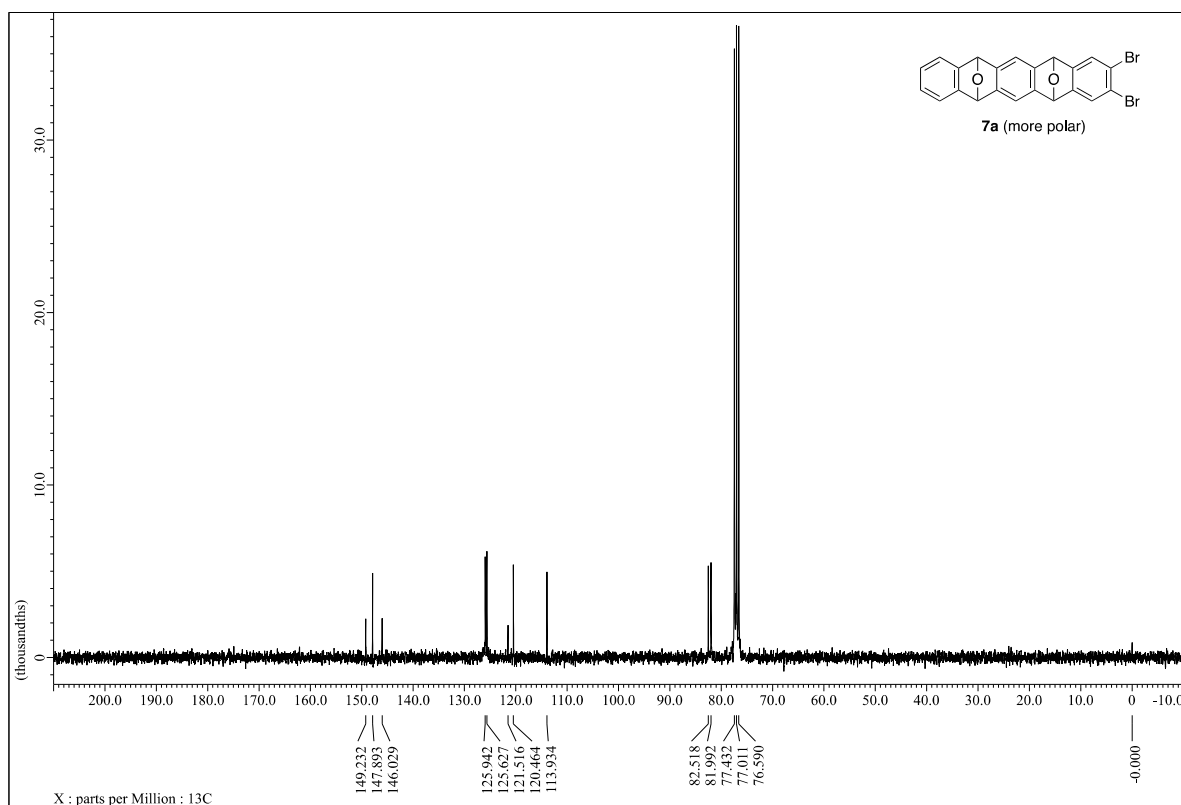

**Figure S18.** <sup>13</sup>C-NMR (300 MHz, CDCl<sub>3</sub>) spectrum of cycloadduct **7a** (more polar).

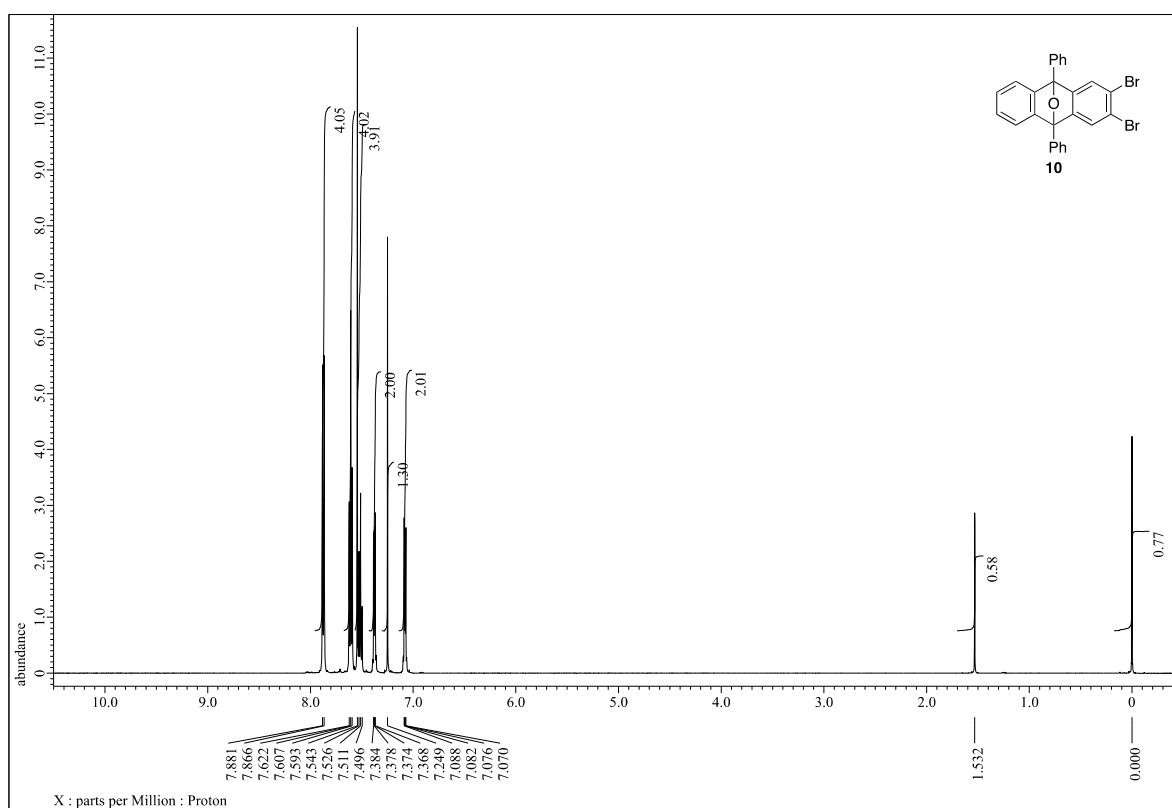

**Figure S19.** <sup>1</sup>H-NMR (500 MHz, CDCl<sub>3</sub>) spectrum of cycloadduct **10**.

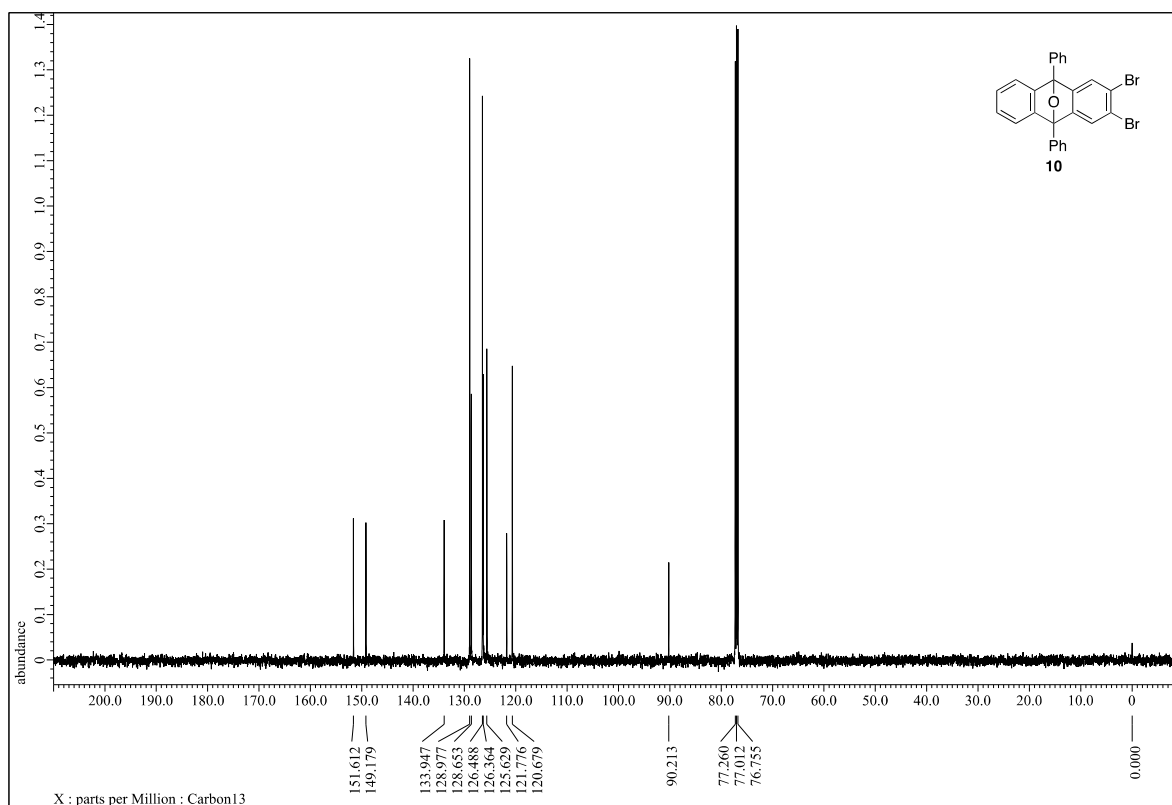

**Figure S20.** <sup>13</sup>C-NMR (500 MHz, CDCl<sub>3</sub>) spectrum of cycloadduct **10**.

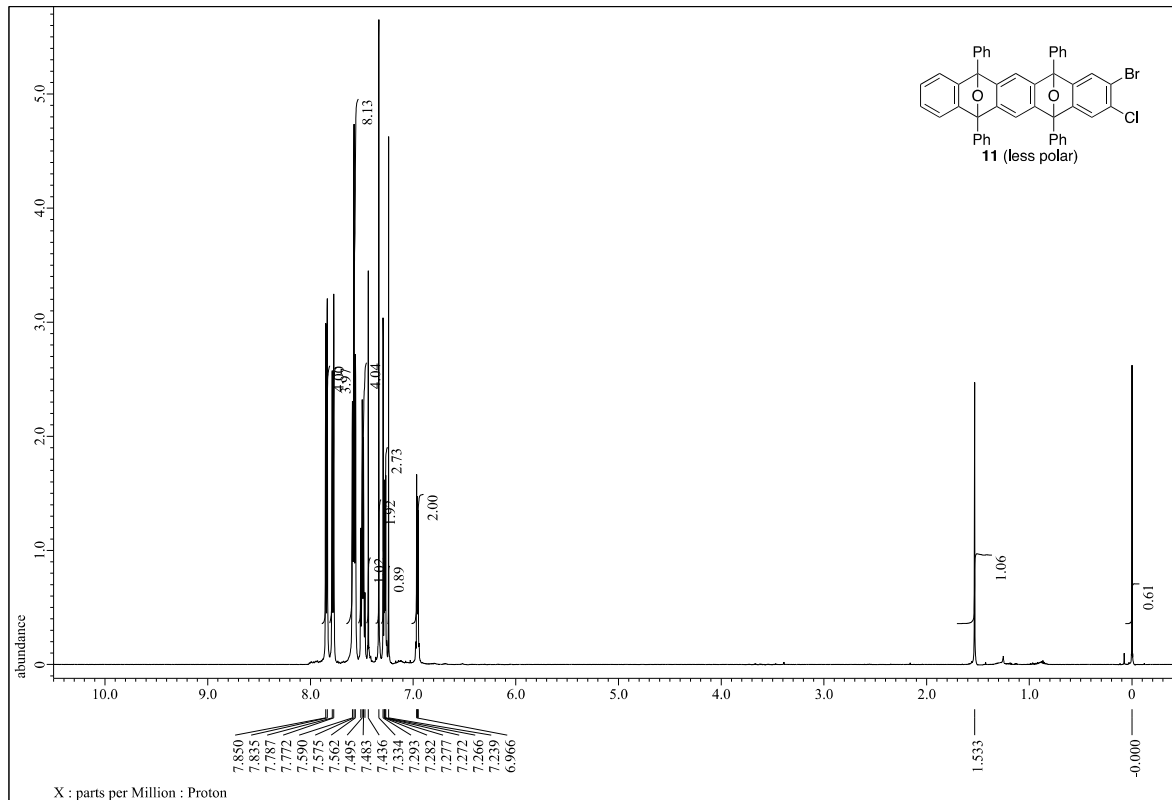

**Figure S21.** <sup>1</sup>H-NMR (500 MHz, CDCl<sub>3</sub>) spectrum of cycloadduct **11** (less polar).

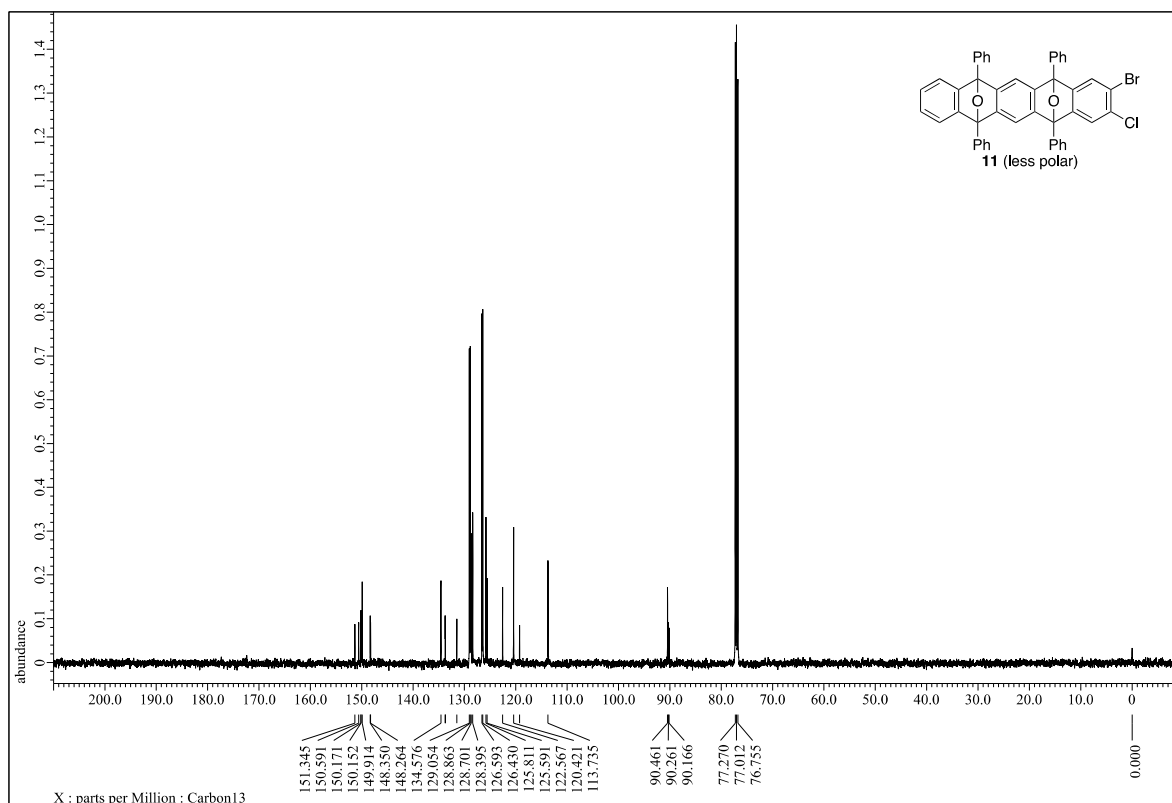

**Figure S22.** <sup>13</sup>C-NMR (500 MHz, CDCl<sub>3</sub>) spectrum of cycloadduct **11** (less polar).

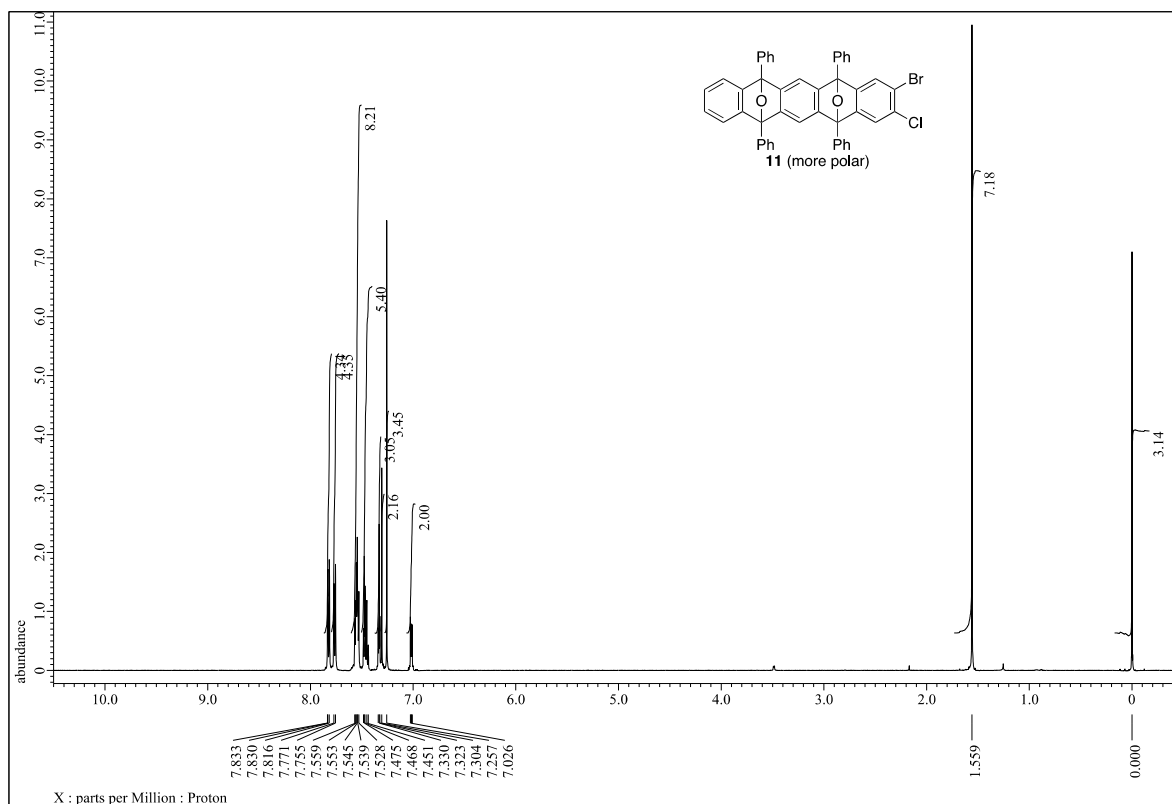

**Figure S23.** <sup>1</sup>H-NMR (500 MHz, CDCl<sub>3</sub>) spectrum of cycloadduct **11** (more polar).

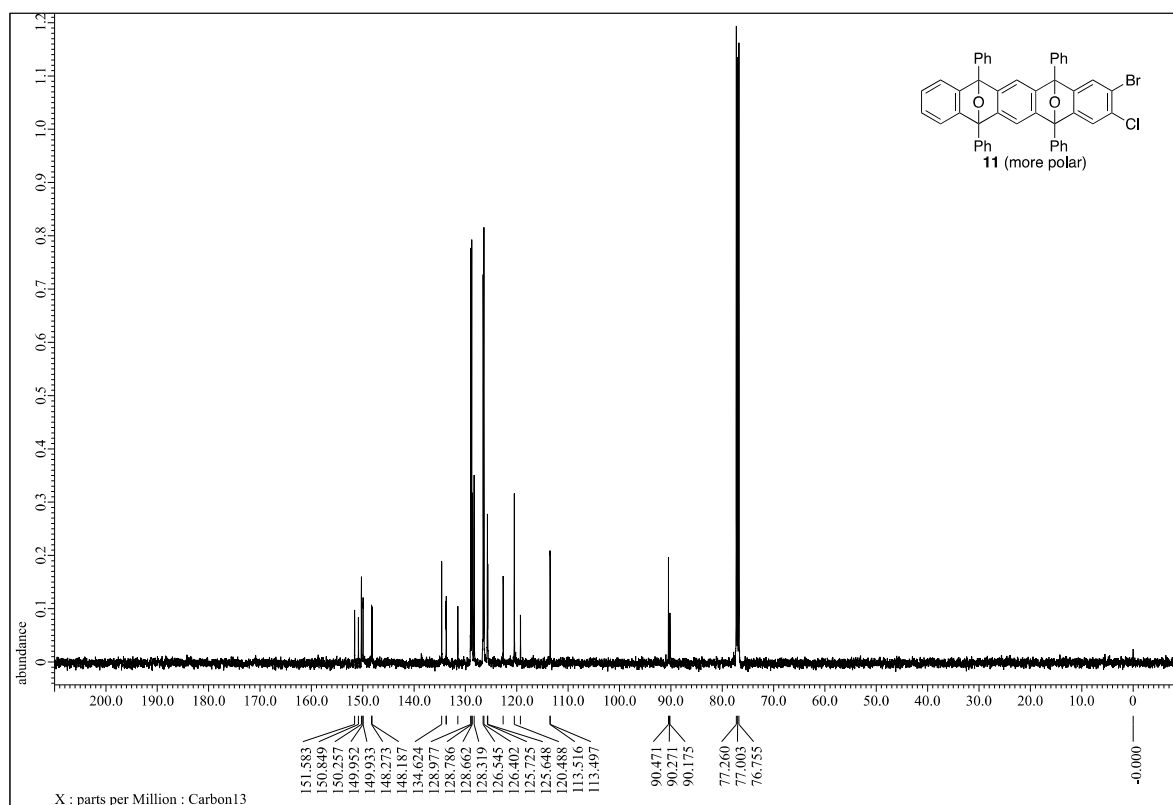

**Figure S24.**  $^{13}\text{C}$ -NMR (500 MHz,  $\text{CDCl}_3$ ) spectrum of cycloadduct **11** (more polar).

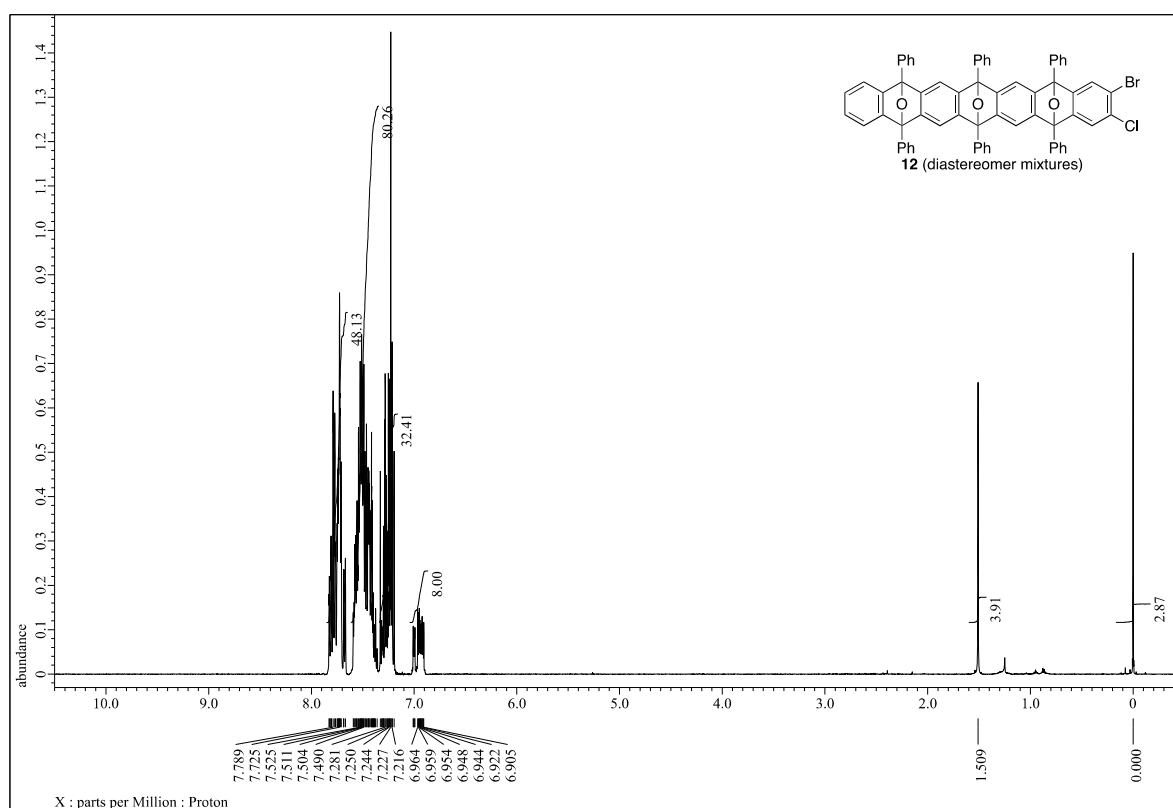

**Figure S25.**  $^1\text{H}$ -NMR (500 MHz,  $\text{CDCl}_3$ ) spectrum of cycloadduct **12** (a mixture of four diastereomers).

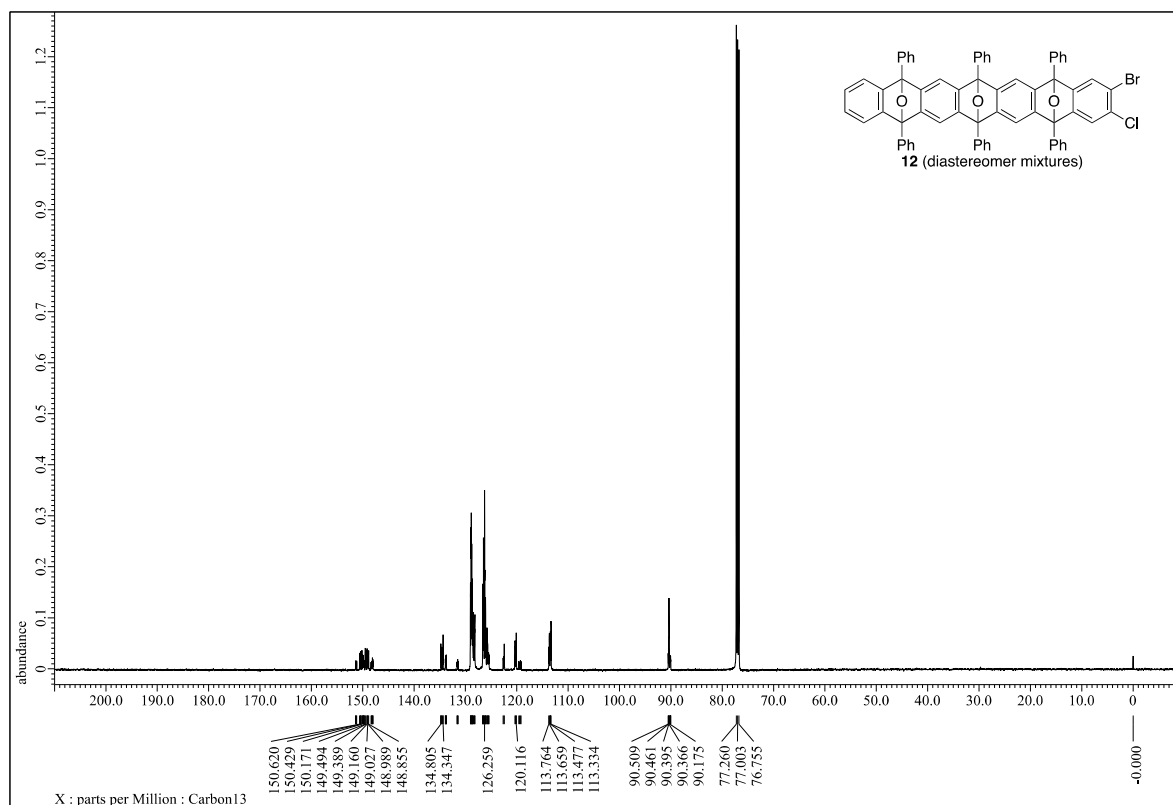

**Figure S26.**  $^{13}\text{C}$ -NMR (500 MHz,  $\text{CDCl}_3$ ) spectrum of cycloadduct **12** (a mixture of four diastereomers).

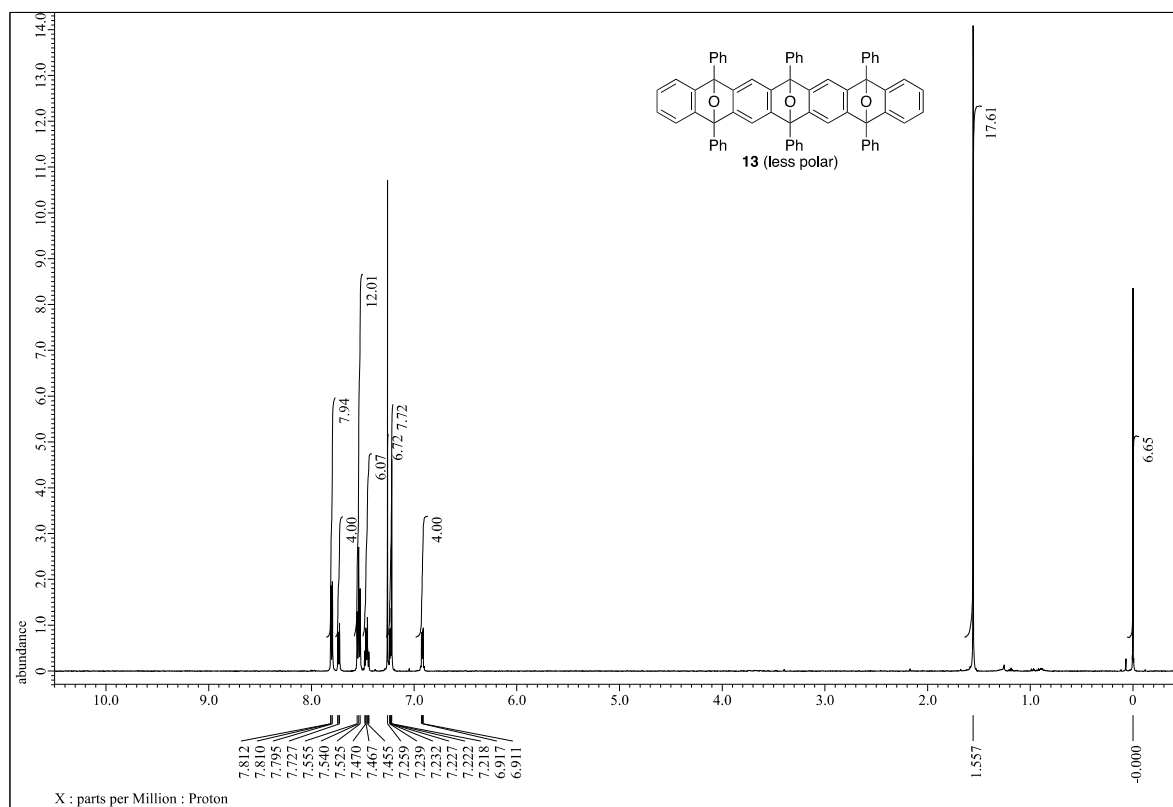

**Figure S27.**  $^1\text{H}$ -NMR (500 MHz,  $\text{CDCl}_3$ ) spectrum of cycloadduct **13** (less polar).

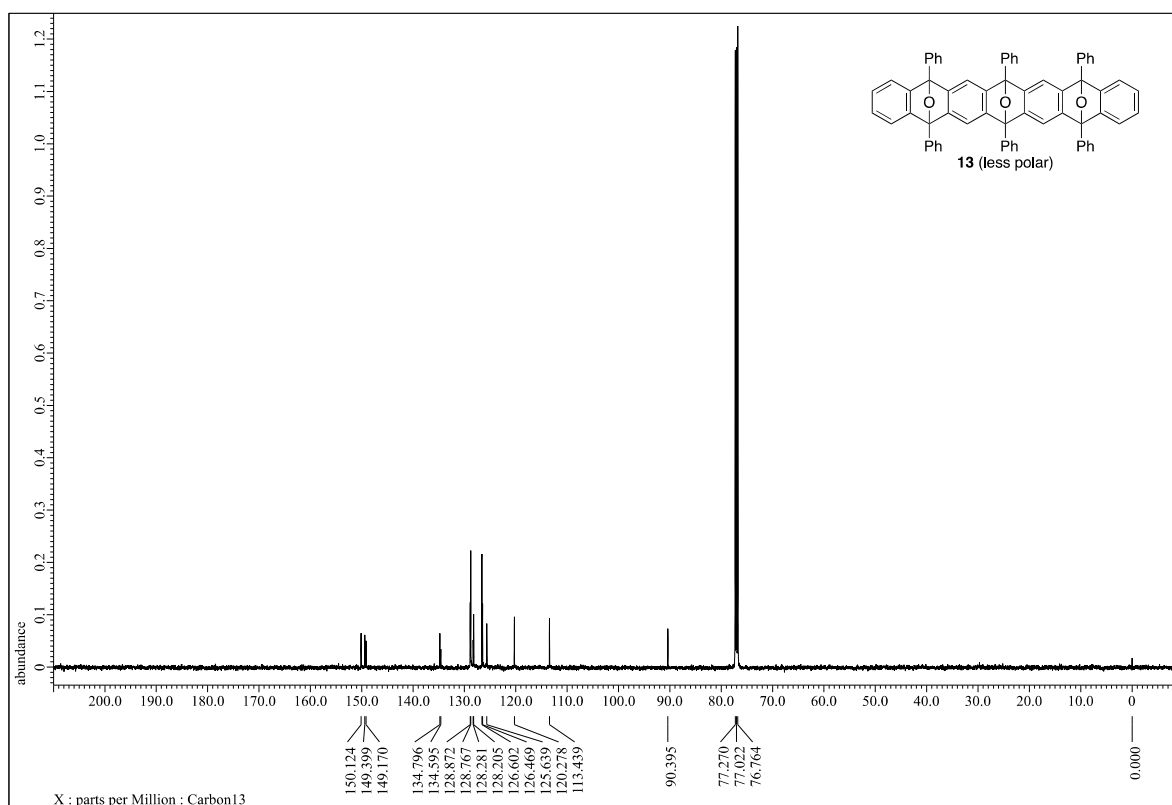

**Figure S28.**  $^{13}\text{C}$ -NMR (500 MHz,  $\text{CDCl}_3$ ) spectrum of cycloadduct **13** (less polar).

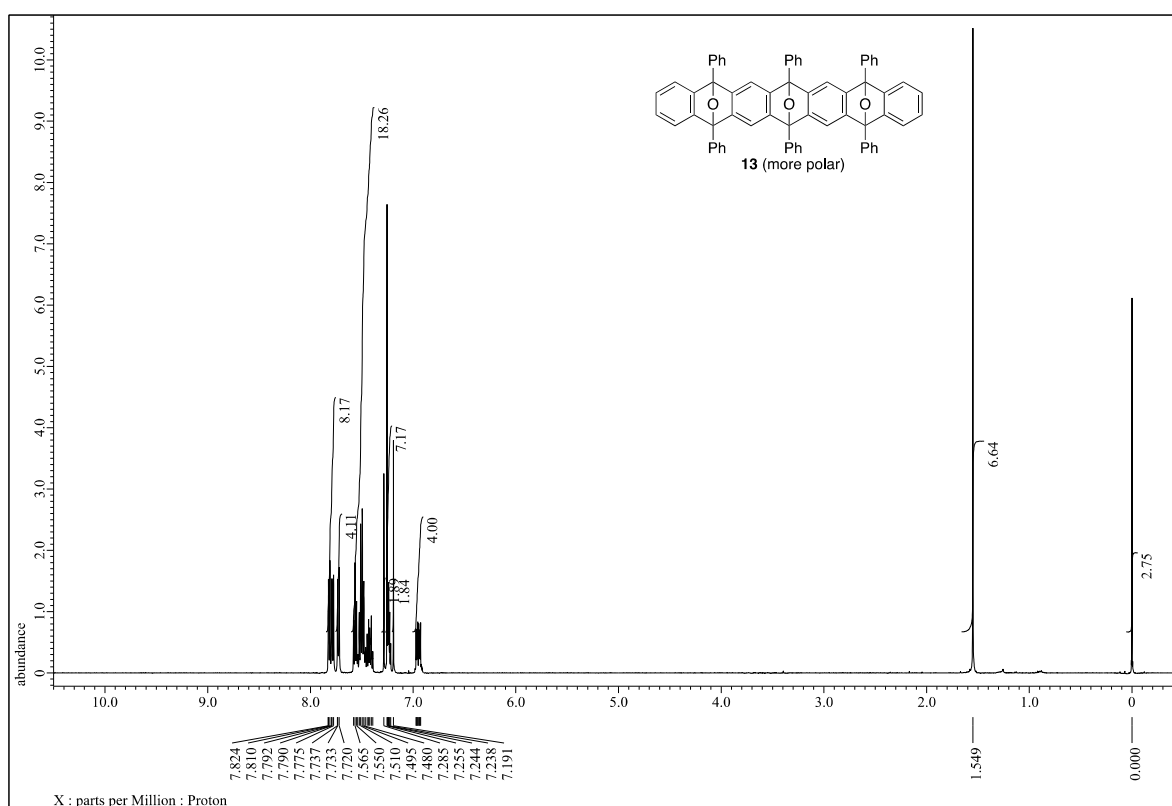

**Figure S29.**  $^1\text{H}$ -NMR (500 MHz,  $\text{CDCl}_3$ ) spectrum of cycloadduct **13** (more polar).

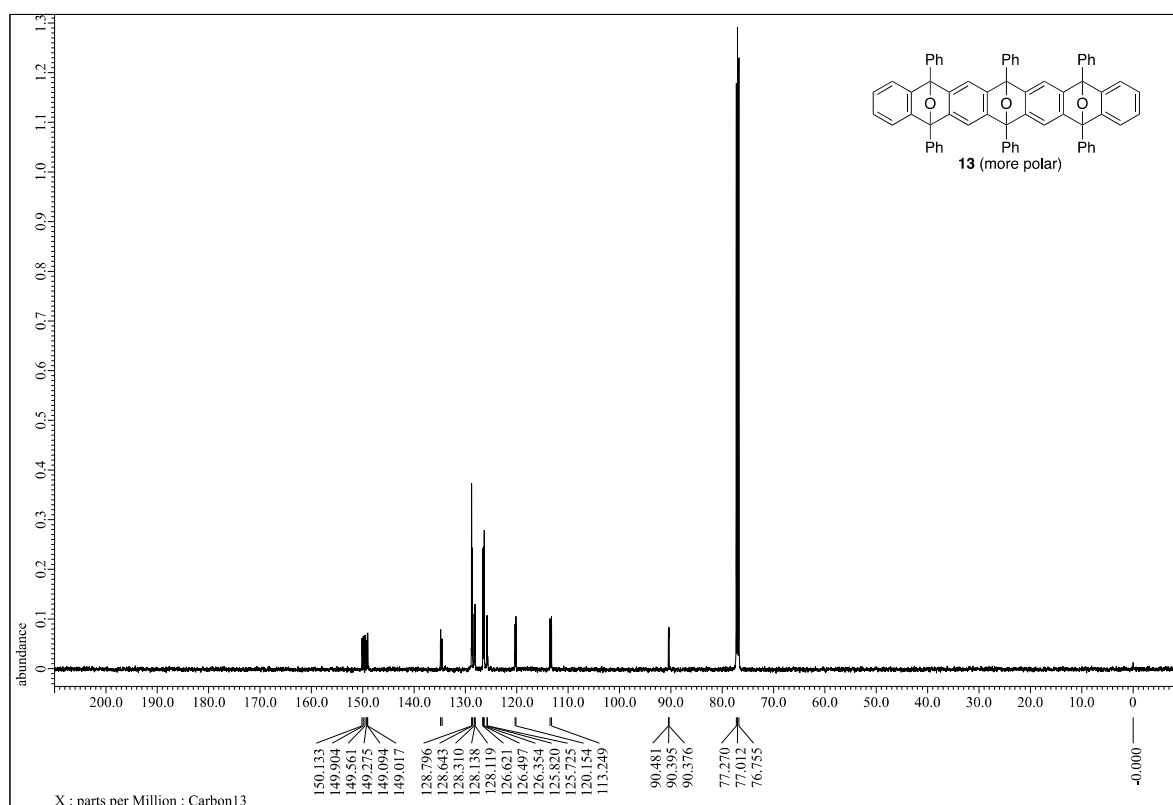

**Figure S30.**  $^{13}\text{C}$ -NMR (500 MHz,  $\text{CDCl}_3$ ) spectrum of cycloadduct **13** (more polar).

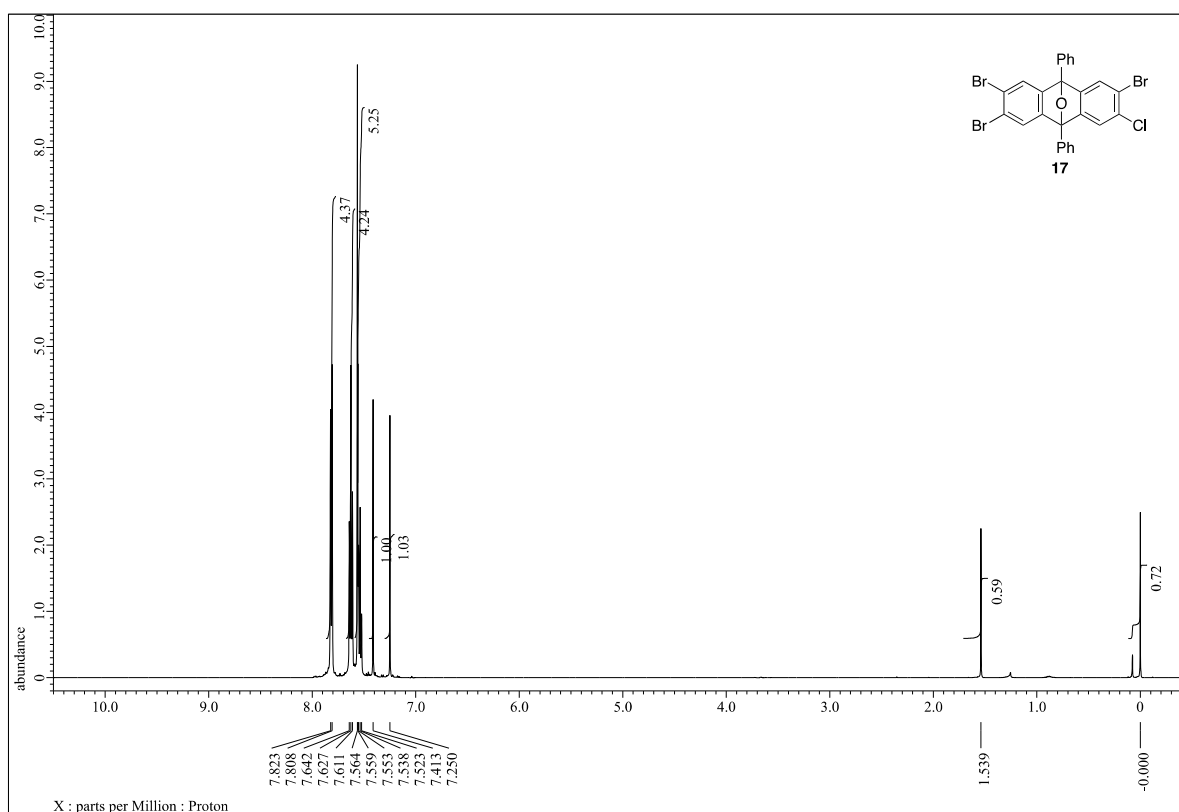

**Figure S31.**  $^1\text{H}$ -NMR (500 MHz,  $\text{CDCl}_3$ ) spectrum of cycloadduct **17**.

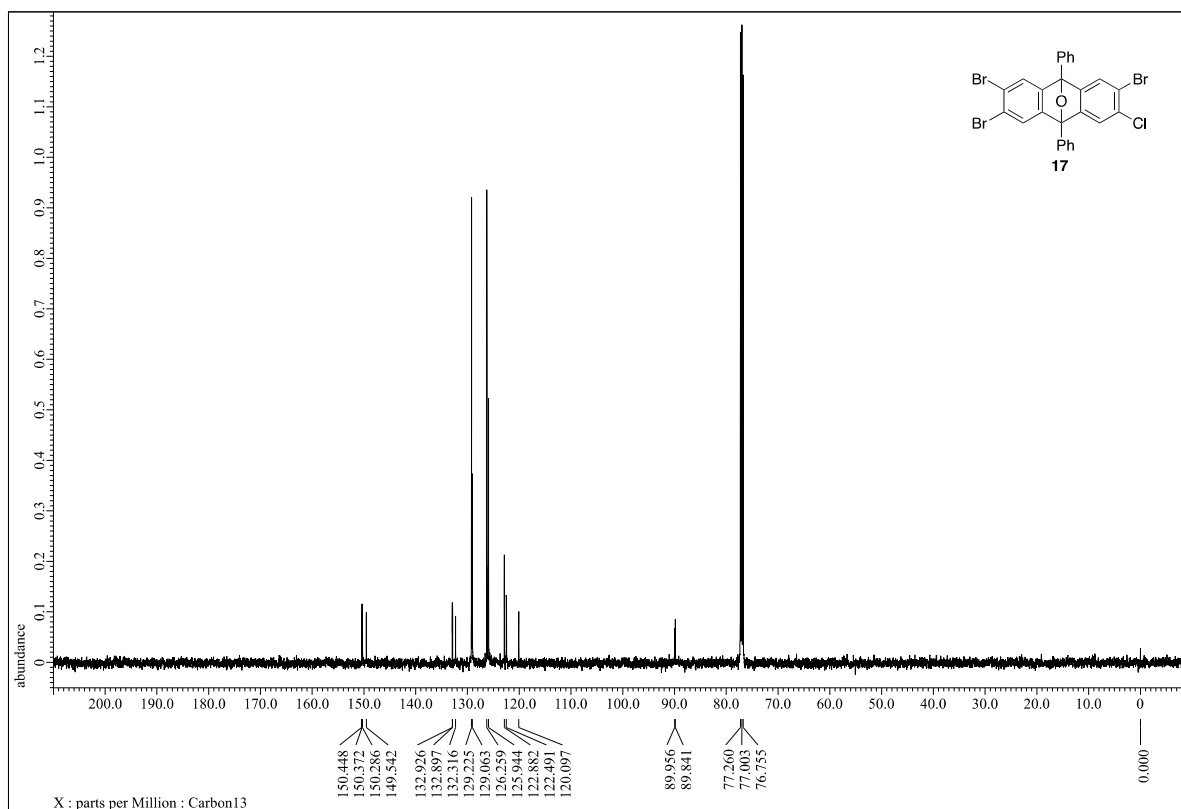

**Figure S32.** <sup>13</sup>C-NMR (500 MHz, CDCl<sub>3</sub>) spectrum of cycloadduct **17**.

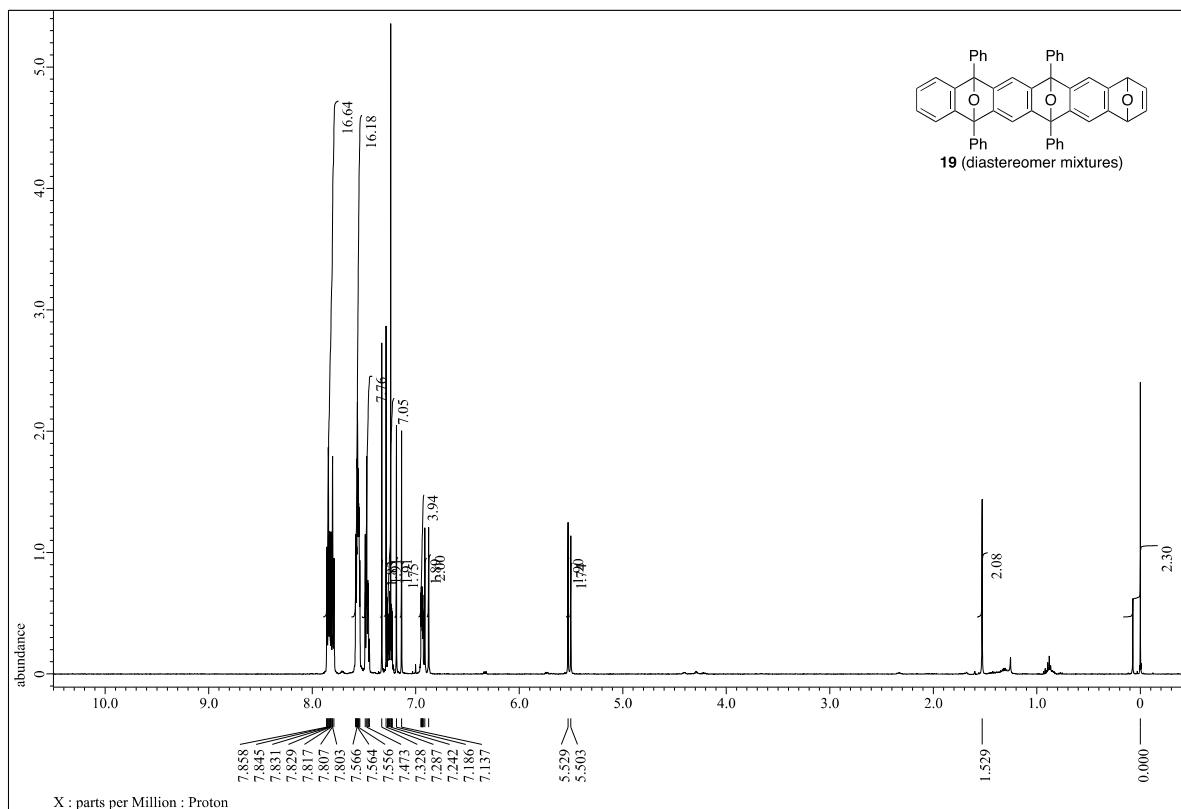

**Figure S33.** <sup>1</sup>H-NMR (500 MHz, CDCl<sub>3</sub>) spectrum of cycloadduct **19** (a mixture of two diastereomers).

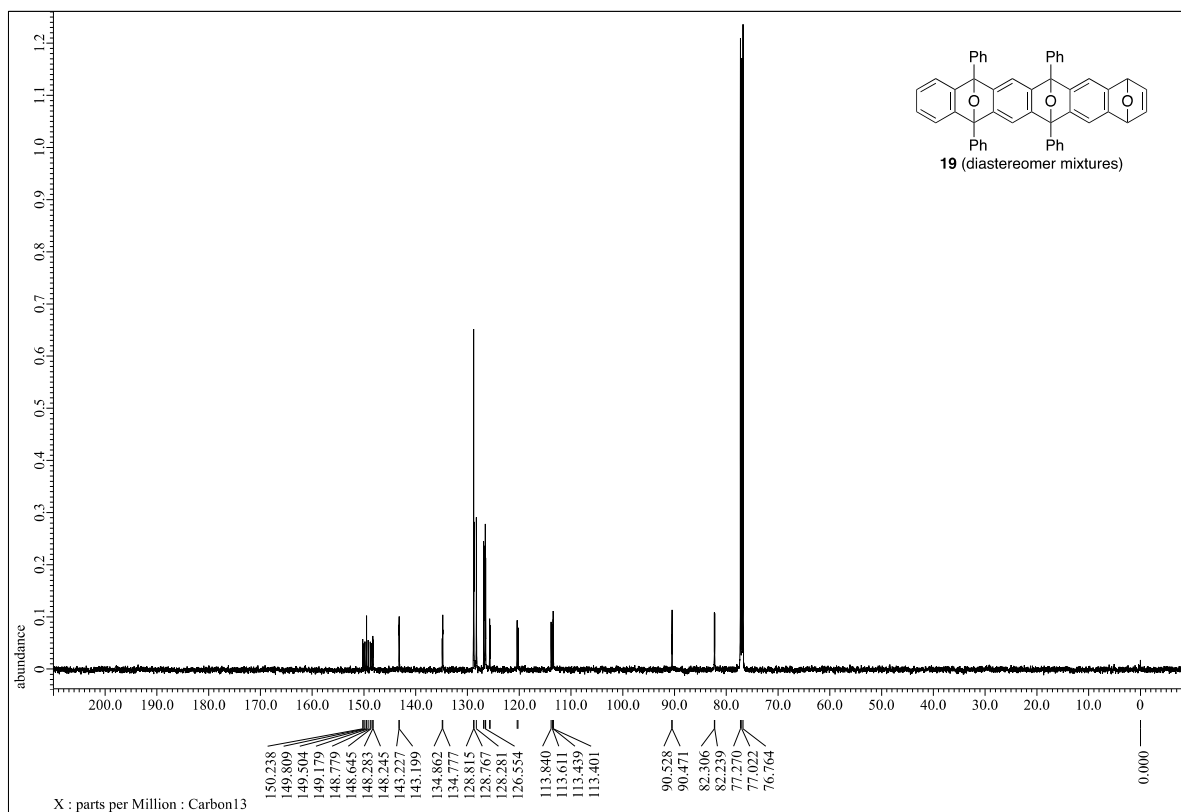

**Figure S34.**  $^{13}\text{C}$ -NMR (500 MHz,  $\text{CDCl}_3$ ) spectrum of cycloadduct **19** (a mixture of two diastereomers).

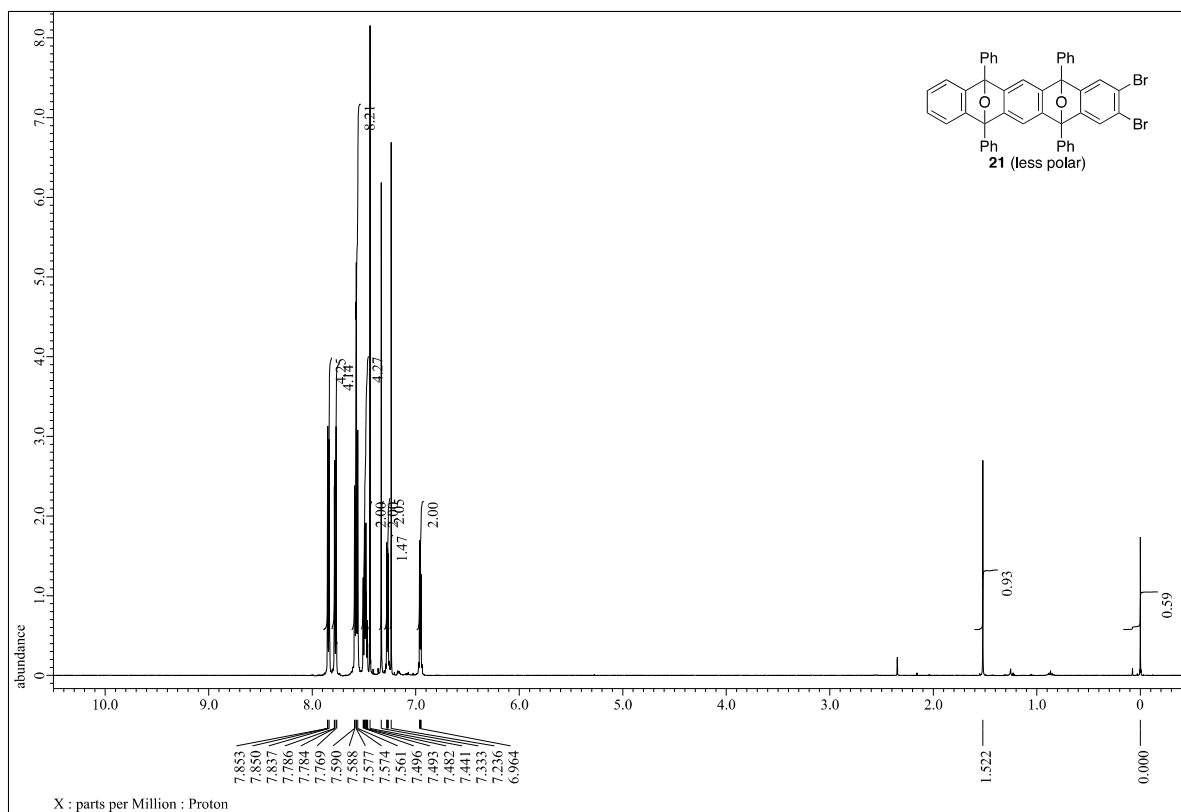

**Figure S35.**  $^1\text{H}$ -NMR (500 MHz,  $\text{CDCl}_3$ ) spectrum of cycloadduct **21** (less polar).

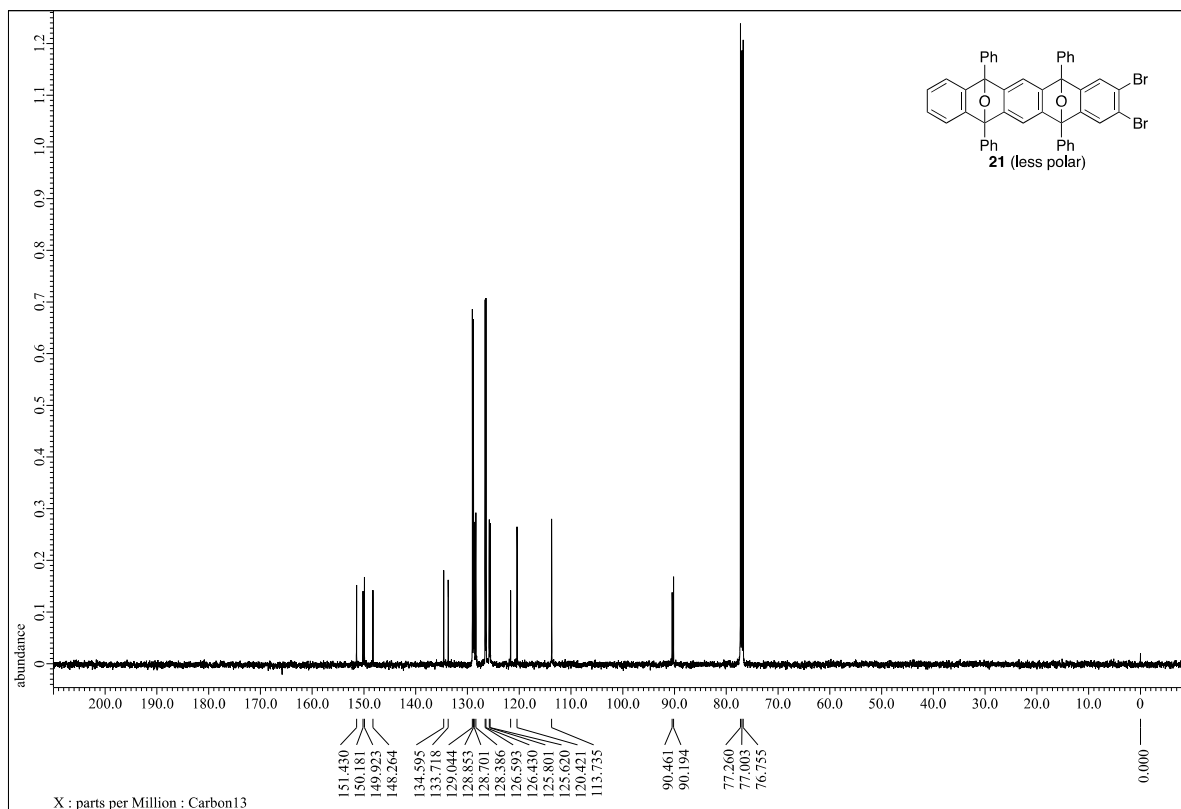

**Figure S36.** <sup>13</sup>C-NMR (500 MHz, CDCl<sub>3</sub>) spectrum of cycloadduct **21** (less polar).

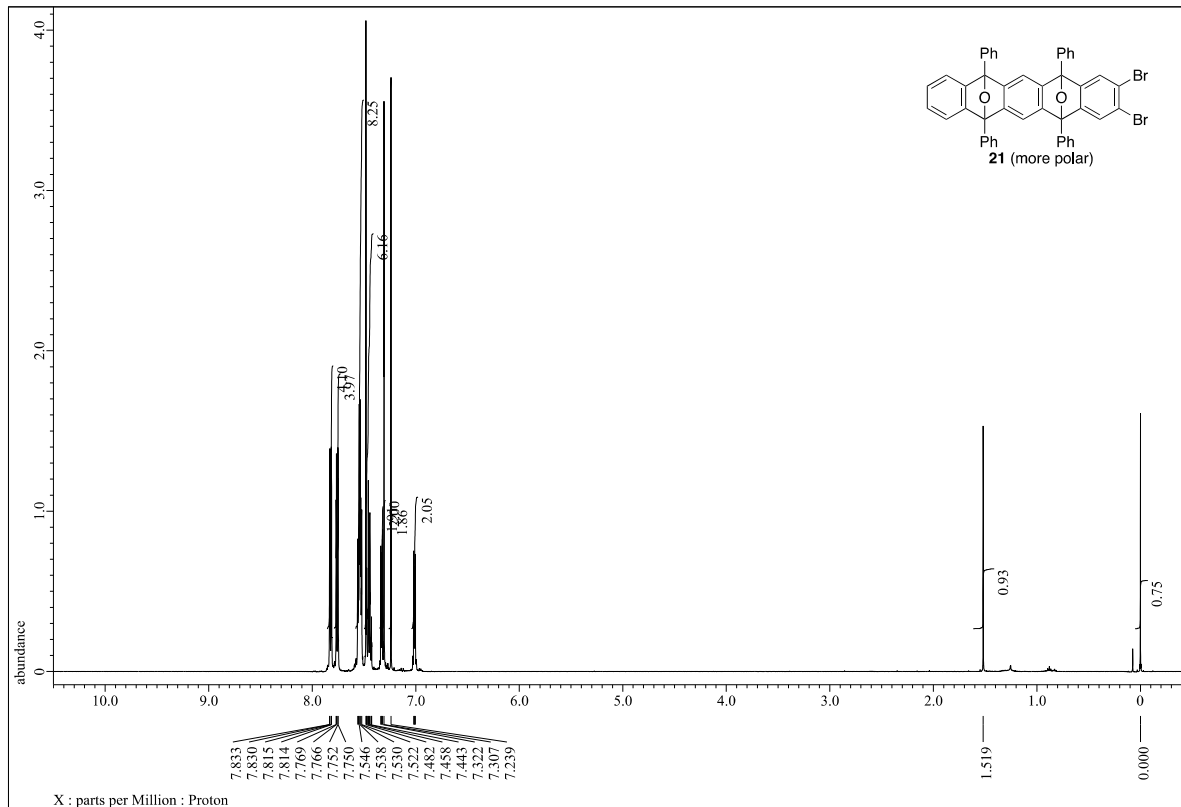

**Figure S37.** <sup>1</sup>H-NMR (500 MHz, CDCl<sub>3</sub>) spectrum of cycloadduct **21** (more polar).

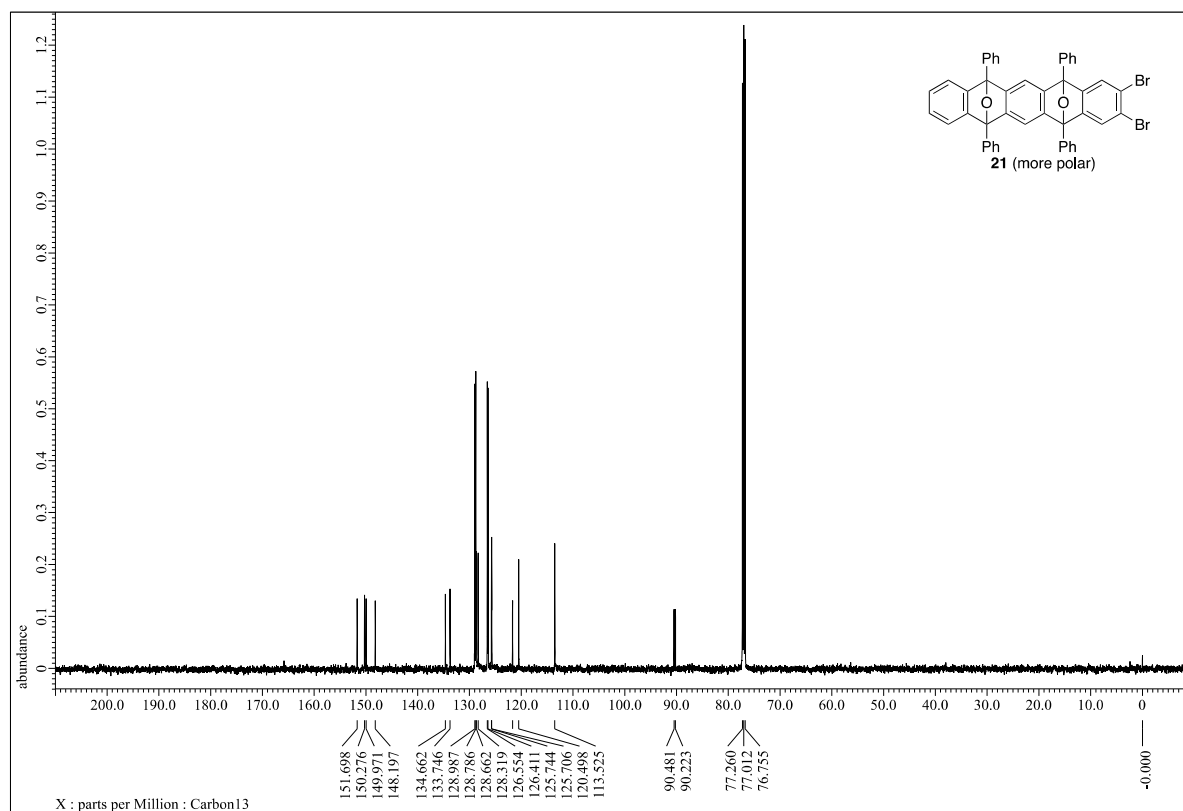

**Figure S38.**  $^{13}\text{C}$ -NMR (500 MHz,  $\text{CDCl}_3$ ) spectrum of cycloadduct **21** (more polar).
